# Supplementary material
Source: HighWire-hosted journal article supplement (https://diabetes.diabetesjournals.org/content/suppl/2004/11/23/53.12.3286)
Supplement: db0613Suppl.pdf [file db0613Suppl.pdf]

On Line Appendix

**Relative distribution of *INS* and *HLA-DRB1-DQB1* genotypes in 944 Type 1 diabetes patients stratified according to their age of disease onset.**

| Age of onset<br>GENOTYPES | INS  | PATIENTS 0-14 yrs |      | Patients 15-40 yrs |      |
|---------------------------|------|-------------------|------|--------------------|------|
|                           |      | N                 | %    | N                  | %    |
| <b>DRB1-DQB1</b>          |      |                   |      |                    |      |
| HIGH RISK                 | I-I  | 346               | 75.7 | 86                 | 73.5 |
| HIGH RISK                 | III+ | 111               | 24.3 | 31                 | 26.5 |
| <b>INTERMEDIATE RISK</b>  |      |                   |      |                    |      |
| INTERMEDIATE RISK         | I-I  | 218               | 86.2 | 61                 | 85.9 |
| INTERMEDIATE RISK         | III+ | 35                | 13.8 | 10                 | 14.1 |
| <b>LOW RISK</b>           |      |                   |      |                    |      |
| LOW RISK                  | I-I  | 26                | 81.3 | 13                 | 92.9 |
| LOW RISK                  | III+ | 6                 | 18.8 | 1                  | 7.1  |
| TOT                       |      | 742               |      | 202                |      |

**Comparison of the HLA genotype frequencies of the 389 blood donors with those of 631 Sardinian random newborns\***

| GENOTYPES<br>DRB1-DQB1 | BLOOD DONORS |      | NEWBORNS |      |
|------------------------|--------------|------|----------|------|
|                        | N            | %    | N        | %    |
| HIGH RISK              | 36           | 9.2  | 54       | 8.6  |
| INTERMEDIATE RISK      | 132          | 33.9 | 229      | 36.3 |
| LOW RISK               | 221          | 56.8 | 348      | 55.2 |
| TOTAL                  | 389          |      | 631      |      |

\* This analysis has been performed to evaluate the impact of the mean age of the controls and of the selection for the healthy status

**Relative distribution of *INS* and *HLA-DRB1-DQB1* genotypes in 944 Type 1 diabetes and 1023 controls**

| HLA RISK     | DRB1        | DQB1        | DRB1          | DQB1        | INS     | T1D        | %    | CONTROLS   | %   | P/C ratio |
|--------------|-------------|-------------|---------------|-------------|---------|------------|------|------------|-----|-----------|
| HIGH RISK    | <b>04*</b>  | <b>0302</b> | <b>04</b>     | <b>0302</b> | I-I     | 24         | 2.5  | 1          | 0.1 |           |
| HIGH RISK    | <b>04</b>   | <b>0302</b> | <b>04</b>     | <b>0302</b> | I-III   | 6          | 0.6  | 0          | 0.0 |           |
| HIGH RISK    | <b>04</b>   | <b>0302</b> | <b>04</b>     | <b>0302</b> | III-III | 0          | 0.0  | 0          | 0.0 |           |
| HIGH RISK    |             |             |               |             | tot     | <b>30</b>  | 3.2  | <b>1</b>   | 0.1 | 32.5      |
|              |             |             |               |             | X       |            |      |            |     |           |
| HIGH RISK    | <b>0301</b> | <b>0201</b> | <b>04</b>     | <b>0302</b> | I-I     | 203        | 21.5 | 14         | 1.4 |           |
| HIGH RISK    | <b>0301</b> | <b>0201</b> | <b>04</b>     | <b>0302</b> | I-III   | 65         | 6.9  | 12         | 1.2 |           |
| HIGH RISK    | <b>0301</b> | <b>0201</b> | <b>04</b>     | <b>0302</b> | III-III | 10         | 1.1  | 1          | 0.1 |           |
| HIGH RISK    |             |             |               |             | tot     | <b>278</b> | 29.4 | <b>27</b>  | 2.6 | 11.2      |
|              |             |             |               |             | X       |            |      |            |     |           |
| HIGH RISK    | <b>0301</b> | <b>0201</b> | <b>0301</b>   | <b>0201</b> | I-I     | 186        | 19.7 | 30         | 2.9 |           |
| HIGH RISK    | <b>0301</b> | <b>0201</b> | <b>0301</b>   | <b>0201</b> | I-III   | 58         | 6.1  | 13         | 1.3 |           |
| HIGH RISK    | <b>0301</b> | <b>0201</b> | <b>0301</b>   | <b>0201</b> | III-III | 3          | 0.3  | 1          | 0.1 |           |
| HIGH RISK    |             |             |               |             | tot     | <b>247</b> | 26.2 | <b>44</b>  | 4.3 | 6.1       |
|              |             |             |               |             | X       |            |      |            |     |           |
| HIGH RISK    | <b>0301</b> | <b>0201</b> | <b>0405</b>   | <b>0201</b> | I-I     | 17         | 1.8  | 3          | 0.3 |           |
| HIGH RISK    | <b>0301</b> | <b>0201</b> | <b>0405</b>   | <b>0201</b> | I-III   | 2          | 0.2  | 1          | 0.1 |           |
| HIGH RISK    | <b>0301</b> | <b>0201</b> | <b>0405</b>   | <b>0201</b> | III-III | 0          | 0.0  | 1          | 0.1 |           |
| HIGH RISK    |             |             |               |             | tot     | <b>19</b>  | 2.0  | <b>5</b>   | 0.5 | 4.1       |
|              |             |             |               |             | X       |            |      |            |     |           |
| INTERMEDIATE | <b>04</b>   | <b>0302</b> | <b>1303-5</b> | <b>0301</b> | I-I     | 3          | 0.3  | 1          | 0.1 |           |
| INTERMEDIATE | <b>04</b>   | <b>0302</b> | <b>1303-5</b> | <b>0301</b> | I-III   | 0          | 0.0  | 0          | 0.0 |           |
| INTERMEDIATE | <b>04</b>   | <b>0302</b> | <b>1303-5</b> | <b>0301</b> | III-III | 0          | 0.0  | 0          | 0.0 |           |
| INTERMEDIATE |             |             |               |             | tot     | <b>3</b>   | 0.3  | <b>1</b>   | 0.1 | 3.3       |
|              |             |             |               |             | X       |            |      |            |     |           |
| INTERMEDIATE | <b>0301</b> | <b>0201</b> | <b>0403</b>   | <b>0305</b> | I-I     | 1          | 0.1  | 0          | 0.0 |           |
| INTERMEDIATE | <b>0301</b> | <b>0201</b> | <b>0403</b>   | <b>0305</b> | I-III   | 0          | 0.0  | 0          | 0.0 |           |
| INTERMEDIATE | <b>0301</b> | <b>0201</b> | <b>0403</b>   | <b>0305</b> | III-III | 0          | 0.0  | 0          | 0.0 |           |
| INTERMEDIATE |             |             |               |             | tot     | <b>1</b>   | 0.1  | <b>0**</b> | 0.0 | 3.3       |
|              |             |             |               |             | X       |            |      |            |     |           |
| INTERMEDIATE | <b>0301</b> | <b>0201</b> | <b>0411</b>   | <b>0201</b> | I-I     | 0          | 0.0  | 0          | 0.0 |           |
| INTERMEDIATE | <b>0301</b> | <b>0201</b> | <b>0411</b>   | <b>0201</b> | I-III   | 1          | 0.1  | 0          | 0.0 |           |
| INTERMEDIATE | <b>0301</b> | <b>0201</b> | <b>0411</b>   | <b>0201</b> | III-III | 0          | 0.0  | 0          | 0.0 |           |
| INTERMEDIATE |             |             |               |             | tot     | <b>1</b>   | 0.1  | <b>0</b>   | 0.0 | 3.3       |
|              |             |             |               |             | X       |            |      |            |     |           |
| INTERMEDIATE | <b>1601</b> | <b>0502</b> | <b>1601</b>   | <b>0501</b> | I-I     | 0          | 0.0  | 0          | 0.0 |           |

|              |      |      |       |      |         |   |     |   |     |     |
|--------------|------|------|-------|------|---------|---|-----|---|-----|-----|
| INTERMEDIATE | 1601 | 0502 | 1601  | 0501 | I-III   | 1 | 0.1 | 0 | 0.0 |     |
| INTERMEDIATE | 1601 | 0502 | 1601  | 0501 | III-III | 0 | 0.0 | 0 | 0.0 |     |
| INTERMEDIATE |      |      |       |      | tot     | 1 | 0.1 | 0 | 0.0 | 3.3 |
|              |      |      |       |      | X       |   |     |   |     |     |
| INTERMEDIATE | 0405 | 0201 | 0701  | 0201 | I-I     | 1 | 0.1 | 0 | 0.0 |     |
| INTERMEDIATE | 0405 | 0201 | 0701  | 0201 | I-III   | 0 | 0.0 | 0 | 0.0 |     |
| INTERMEDIATE | 0405 | 0201 | 0701  | 0201 | III-III | 0 | 0.0 | 0 | 0.0 |     |
| INTERMEDIATE |      |      |       |      | tot     | 1 | 0.1 | 0 | 0.0 | 3.3 |
|              |      |      |       |      | X       |   |     |   |     |     |
| INTERMEDIATE | 0405 | 0201 | 08    | 0402 | I-I     | 1 | 0.1 | 0 | 0.0 |     |
| INTERMEDIATE | 0405 | 0201 | 08    | 0402 | I-III   | 0 | 0.0 | 0 | 0.0 |     |
| INTERMEDIATE | 0405 | 0201 | 08    | 0402 | III-III | 0 | 0.0 | 0 | 0.0 |     |
| INTERMEDIATE |      |      |       |      | tot     | 1 | 0.1 | 0 | 0.0 | 3.3 |
|              |      |      |       |      | X       |   |     |   |     |     |
| INTERMEDIATE | 04   | 0302 | 11-12 | 0302 | I-I     | 0 | 0.0 | 0 | 0.0 |     |
| INTERMEDIATE | 04   | 0302 | 11-12 | 0302 | I-III   | 1 | 0.1 | 0 | 0.0 |     |
| INTERMEDIATE | 04   | 0302 | 11-12 | 0302 | III-III | 0 | 0.0 | 0 | 0.0 |     |
| INTERMEDIATE |      |      |       |      | tot     | 1 | 0.1 | 0 | 0.0 | 3.3 |
|              |      |      |       |      | X       |   |     |   |     |     |
| INTERMEDIATE | 04   | 0302 | 1302  | 0604 | I-I     | 1 | 0.1 | 0 | 0.0 |     |
| INTERMEDIATE | 04   | 0302 | 1302  | 0604 | I-III   | 0 | 0.0 | 0 | 0.0 |     |
| INTERMEDIATE | 04   | 0302 | 1302  | 0604 | III-III | 0 | 0.0 | 0 | 0.0 |     |
| INTERMEDIATE |      |      |       |      | tot     | 1 | 0.1 | 0 | 0.0 | 3.3 |
|              |      |      |       |      | X       |   |     |   |     |     |
| INTERMEDIATE | 04   | 0302 | 1502  | 0502 | I-I     | 1 | 0.1 | 0 | 0.0 |     |
| INTERMEDIATE | 04   | 0302 | 1502  | 0502 | I-III   | 0 | 0.0 | 0 | 0.0 |     |
| INTERMEDIATE | 04   | 0302 | 1502  | 0502 | III-III | 0 | 0.0 | 0 | 0.0 |     |
| INTERMEDIATE |      |      |       |      | tot     | 1 | 0.1 | 0 | 0.0 | 3.3 |
|              |      |      |       |      | X       |   |     |   |     |     |
| INTERMEDIATE | 04   | 0302 | 130   | 0605 | I-I     | 1 | 0.1 | 0 | 0.0 |     |
| INTERMEDIATE | 04   | 0302 | 130   | 0605 | I-III   | 0 | 0.0 | 0 | 0.0 |     |
| INTERMEDIATE | 04   | 0302 | 130   | 0605 | III-III | 0 | 0.0 | 0 | 0.0 |     |
| INTERMEDIATE |      |      |       |      | tot     | 1 | 0.1 | 0 | 0.0 | 3.3 |
|              |      |      |       |      | X       |   |     |   |     |     |
| INTERMEDIATE | 04   | 0302 |       | 0201 | I-I     | 1 | 0.1 | 0 | 0.0 |     |
| INTERMEDIATE | 04   | 0302 | 1304  | 0201 | I-III   | 0 | 0.0 | 0 | 0.0 |     |
| INTERMEDIATE | 04   | 0302 | 1304  | 0201 | III-III | 0 | 0.0 | 0 | 0.0 |     |
| INTERMEDIATE |      |      |       |      | tot     | 1 | 0.1 | 0 | 0.0 | 3.3 |
|              |      |      |       |      | X       |   |     |   |     |     |
| INTERMEDIATE | 01   | 0501 | 0408  | 0301 | I-I     | 0 | 0.0 | 0 | 0.0 |     |
| INTERMEDIATE | 01   | 0501 | 0408  | 0301 | I-III   | 1 | 0.1 | 0 | 0.0 |     |

|              |       |      |      |      |         |     |      |    |     |     |
|--------------|-------|------|------|------|---------|-----|------|----|-----|-----|
| INTERMEDIATE | 01    | 0501 | 0408 | 0301 | III-III | 0   | 0.0  | 0  | 0.0 |     |
| INTERMEDIATE |       |      |      |      | tot     | 1   | 0.1  | 0  | 0.0 | 3.3 |
|              |       |      |      |      | X       |     |      |    |     |     |
| INTERMEDIATE | 01    | 0501 | 1302 | 0604 | I-I     | 1   | 0.1  | 0  | 0.0 |     |
| INTERMEDIATE | 01    | 0501 | 1302 | 0604 | I-III   | 0   | 0.0  | 0  | 0.0 |     |
| INTERMEDIATE | 01    | 0501 | 1302 | 0604 | III-III | 0   | 0.0  | 0  | 0.0 |     |
| INTERMEDIATE |       |      |      |      | tot     | 1   | 0.1  | 0  | 0.0 | 3.3 |
|              |       |      |      |      | X       |     |      |    |     |     |
| INTERMEDIATE | 11-12 | 0502 | 04   | 0302 | I-I     | 1   | 0.1  | 0  | 0.0 |     |
| INTERMEDIATE | 11-12 | 0502 | 04   | 0302 | I-III   | 0   | 0.0  | 0  | 0.0 |     |
| INTERMEDIATE | 11-12 | 0502 | 04   | 0302 | III-III | 0   | 0.0  | 0  | 0.0 |     |
| INTERMEDIATE |       |      |      |      | tot     | 1   | 0.1  | 0  | 0.0 | 3.3 |
|              |       |      |      |      | X       |     |      |    |     |     |
| INTERMEDIATE | 0901  | 0303 | 0405 | 0201 | I-I     | 1   | 0.1  | 0  | 0.0 |     |
| INTERMEDIATE | 0901  | 0303 | 0405 | 0201 | I-III   | 0   | 0.0  | 0  | 0.0 |     |
| INTERMEDIATE | 0901  | 0303 | 0405 | 0201 | III-III | 0   | 0.0  | 0  | 0.0 |     |
| INTERMEDIATE |       |      |      |      | tot     | 1   | 0.1  | 0  | 0.0 | 3.3 |
|              |       |      |      |      | X       |     |      |    |     |     |
| INTERMEDIATE | 04    | 0201 | 04   | 0302 | I-I     | 1   | 0.1  | 0  | 0.0 |     |
| INTERMEDIATE | 04    | 0201 | 04   | 0302 | I-III   | 0   | 0.0  | 0  | 0.0 |     |
| INTERMEDIATE | 04    | 0201 | 04   | 0302 | III-III | 0   | 0.0  | 0  | 0.0 |     |
| INTERMEDIATE |       |      |      |      | tot     | 1   | 0.1  | 0  | 0.0 | 3.3 |
|              |       |      |      |      | X       |     |      |    |     |     |
| INTERMEDIATE | 0301  | 0201 | 1302 | 0604 | I-I     | 8   | 0.8  | 5  | 0.5 |     |
| INTERMEDIATE | 0301  | 0201 | 1302 | 0604 | I-III   | 2   | 0.2  | 0  | 0.0 |     |
| INTERMEDIATE | 0301  | 0201 | 1302 | 0604 | III-III | 0   | 0.0  | 0  | 0.0 |     |
| INTERMEDIATE |       |      |      |      | tot     | 10  | 1.1  | 5  | 0.5 | 2.2 |
|              |       |      |      |      | X       |     |      |    |     |     |
| INTERMEDIATE | 0405  | 0201 | 04   | 0302 | I-I     | 4   | 0.4  | 0  | 0.0 |     |
| INTERMEDIATE | 0405  | 0201 | 04   | 0302 | I-III   | 0   | 0.0  | 1  | 0.1 |     |
| INTERMEDIATE | 0405  | 0201 | 04   | 0302 | III-III | 0   | 0.0  | 1  | 0.1 |     |
| INTERMEDIATE |       |      |      |      | tot     | 4   | 0.4  | 2  | 0.2 | 2.2 |
|              |       |      |      |      | X       |     |      |    |     |     |
| INTERMEDIATE | 0301  | 0201 | 1601 | 0502 | I-I     | 124 | 13.1 | 59 | 5.8 |     |
| INTERMEDIATE | 0301  | 0201 | 1601 | 0502 | I-III   | 13  | 1.4  | 30 | 2.9 |     |
| INTERMEDIATE | 0301  | 0201 | 1601 | 0502 | III-III | 1   | 0.1  | 4  | 0.4 |     |
| INTERMEDIATE |       |      |      |      | tot     | 138 | 14.6 | 93 | 9.1 | 1.6 |
|              |       |      |      |      | X       |     |      |    |     |     |
| INTERMEDIATE | 1601  | 0502 | 04   | 0302 | I-I     | 26  | 2.8  | 15 | 1.5 |     |
| INTERMEDIATE | 1601  | 0502 | 04   | 0302 | I-III   | 4   | 0.4  | 7  | 0.7 |     |
| INTERMEDIATE | 1601  | 0502 | 04   | 0302 | III-III | 1   | 0.1  | 0  | 0.0 |     |

|              |             |             |              |             |         |           |     |           |     |     |
|--------------|-------------|-------------|--------------|-------------|---------|-----------|-----|-----------|-----|-----|
| INTERMEDIATE |             |             |              |             | tot     | <b>31</b> | 3.3 | <b>22</b> | 2.2 | 1.5 |
|              |             |             |              |             | X       |           |     |           |     |     |
| INTERMEDIATE | <b>0301</b> | <b>0201</b> | <b>0403</b>  | <b>0302</b> | I-I     | 8         | 0.8 | 5         | 0.5 |     |
| INTERMEDIATE | <b>0301</b> | <b>0201</b> | <b>0403</b>  | <b>0302</b> | I-III   | 3         | 0.3 | 3         | 0.3 |     |
| INTERMEDIATE | <b>0301</b> | <b>0201</b> | <b>0403</b>  | <b>0302</b> | III-III | 0         | 0.0 | 0         | 0.0 |     |
| INTERMEDIATE |             |             |              |             | tot     | <b>11</b> | 1.2 | <b>8</b>  | 0.8 | 1.5 |
|              |             |             |              |             | X       |           |     |           |     |     |
| INTERMEDIATE | <b>04</b>   | <b>0302</b> | <b>0405</b>  | <b>0301</b> | I-I     | 3         | 0.3 | 2         | 0.2 |     |
| INTERMEDIATE | <b>04</b>   | <b>0302</b> | <b>0405</b>  | <b>0301</b> | I-III   | 1         | 0.1 | 0         | 0.0 |     |
| INTERMEDIATE | <b>04</b>   | <b>0302</b> | <b>0405</b>  | <b>0301</b> | III-III | 0         | 0.0 | 1         | 0.1 |     |
| INTERMEDIATE |             |             |              |             | tot     | <b>4</b>  | 0.4 | <b>3</b>  | 0.3 | 1.4 |
|              |             |             |              |             | X       |           |     |           |     |     |
| INTERMEDIATE | <b>04</b>   | <b>0302</b> | <b>11-12</b> | <b>0301</b> | I-I     | 13        | 1.4 | 9         | 0.9 |     |
| INTERMEDIATE | <b>04</b>   | <b>0302</b> | <b>11-12</b> | <b>0301</b> | I-III   | 1         | 0.1 | 2         | 0.2 |     |
| INTERMEDIATE | <b>04</b>   | <b>0302</b> | <b>11-12</b> | <b>0301</b> | III-III | 0         | 0.0 | 1         | 0.1 |     |
| INTERMEDIATE |             |             |              |             | tot     | <b>14</b> | 1.5 | <b>12</b> | 1.2 | 1.3 |
|              |             |             |              |             | X       |           |     |           |     |     |
| INTERMEDIATE | <b>0301</b> | <b>0201</b> | <b>0405</b>  | <b>0301</b> | I-I     | 12        | 1.3 | 11        | 1.1 |     |
| INTERMEDIATE | <b>0301</b> | <b>0201</b> | <b>0405</b>  | <b>0301</b> | I-III   | 2         | 0.2 | 2         | 0.2 |     |
| INTERMEDIATE | <b>0301</b> | <b>0201</b> | <b>0405</b>  | <b>0301</b> | III-III | 0         | 0.0 | 0         | 0.0 |     |
| INTERMEDIATE |             |             |              |             | tot     | <b>14</b> | 1.5 | <b>13</b> | 1.3 | 1.2 |
|              |             |             |              |             | X       |           |     |           |     |     |
| INTERMEDIATE | <b>04</b>   | <b>0302</b> | <b>0403</b>  | <b>0302</b> | I-I     | 1         | 0.1 | 0         | 0.0 |     |
| INTERMEDIATE | <b>04</b>   | <b>0302</b> | <b>0403</b>  | <b>0302</b> | I-III   | 0         | 0.0 | 1         | 0.1 |     |
| INTERMEDIATE | <b>04</b>   | <b>0302</b> | <b>0403</b>  | <b>0302</b> | III-III | 0         | 0.0 | 0         | 0.0 |     |
| INTERMEDIATE |             |             |              |             | tot     | <b>1</b>  | 0.1 | <b>1</b>  | 0.1 | 1.1 |
|              |             |             |              |             | X       |           |     |           |     |     |
| INTERMEDIATE | <b>04</b>   | <b>0302</b> | <b>01</b>    | <b>0501</b> | I-I     | 9         | 1.0 | 5         | 0.5 |     |
| INTERMEDIATE | <b>04</b>   | <b>0302</b> | <b>01</b>    | <b>0501</b> | I-III   | 0         | 0.0 | 4         | 0.4 |     |
| INTERMEDIATE | <b>04</b>   | <b>0302</b> | <b>01</b>    | <b>0501</b> | III-III | 0         | 0.0 | 0         | 0.0 |     |
| INTERMEDIATE |             |             |              |             | tot     | <b>9</b>  | 1.0 | <b>9</b>  | 0.9 | 1.1 |
|              |             |             |              |             | X       |           |     |           |     |     |
| INTERMEDIATE | <b>01</b>   | <b>0501</b> | <b>08</b>    | <b>0402</b> | I-I     | 2         | 0.2 | 2         | 0.2 |     |
| INTERMEDIATE | <b>01</b>   | <b>0501</b> | <b>08</b>    | <b>0402</b> | I-III   | 0         | 0.0 | 0         | 0.0 |     |
| INTERMEDIATE | <b>01</b>   | <b>0501</b> | <b>08</b>    | <b>0402</b> | III-III | 0         | 0.0 | 0         | 0.0 |     |
| INTERMEDIATE |             |             |              |             | tot     | <b>2</b>  | 0.2 | <b>2</b>  | 0.2 | 1.1 |
|              |             |             |              |             | X       |           |     |           |     |     |
| INTERMEDIATE | <b>0301</b> | <b>0201</b> | <b>0301</b>  | <b>0301</b> | I-I     | 1         | 0.1 | 1         | 0.1 |     |
| INTERMEDIATE | <b>0301</b> | <b>0201</b> | <b>0301</b>  | <b>0301</b> | I-III   | 0         | 0.0 | 0         | 0.0 |     |
| INTERMEDIATE | <b>0301</b> | <b>0201</b> | <b>0301</b>  | <b>0301</b> | III-III | 0         | 0.0 | 0         | 0.0 |     |
| INTERMEDIATE |             |             |              |             | tot     | <b>1</b>  | 0.1 | <b>1</b>  | 0.1 | 1.1 |

|              |             |             |             |             |         |           |     |           |     |     |
|--------------|-------------|-------------|-------------|-------------|---------|-----------|-----|-----------|-----|-----|
|              |             |             |             |             | X       |           |     |           |     |     |
| INTERMEDIATE | <b>0405</b> | <b>0201</b> | <b>01</b>   | <b>0501</b> | I-I     | 1         | 0.1 | 0         | 0.0 |     |
| INTERMEDIATE | <b>0405</b> | <b>0201</b> | <b>01</b>   | <b>0501</b> | I-III   | 0         | 0.0 | 1         | 0.1 |     |
| INTERMEDIATE | <b>0405</b> | <b>0201</b> | <b>01</b>   | <b>0501</b> | III-III | 0         | 0.0 | 0         | 0.0 |     |
| INTERMEDIATE |             |             |             |             | tot     | <b>1</b>  | 0.1 | <b>1</b>  | 0.1 | 1.1 |
|              |             |             |             |             | X       |           |     |           |     |     |
| INTERMEDIATE | <b>04</b>   | <b>0302</b> | <b>08</b>   | <b>0402</b> | I-I     | 1         | 0.1 | 1         | 0.1 |     |
| INTERMEDIATE | <b>04</b>   | <b>0302</b> | <b>08</b>   | <b>0402</b> | I-III   | 0         | 0.0 | 0         | 0.0 |     |
| INTERMEDIATE | <b>04</b>   | <b>0302</b> | <b>08</b>   | <b>0402</b> | III-III | 0         | 0.0 | 0         | 0.0 |     |
| INTERMEDIATE |             |             |             |             | tot     | <b>1</b>  | 0.1 | <b>1</b>  | 0.1 | 1.1 |
|              |             |             |             |             | X       |           |     |           |     |     |
| INTERMEDIATE | <b>1302</b> | <b>0604</b> | <b>10</b>   | <b>0501</b> | I-I     | 1         | 0.1 | 1         | 0.1 |     |
| INTERMEDIATE | <b>1302</b> | <b>0604</b> | <b>10</b>   | <b>0501</b> | I-III   | 0         | 0.0 | 0         | 0.0 |     |
| INTERMEDIATE | <b>1302</b> | <b>0604</b> | <b>10</b>   | <b>0501</b> | III-III | 0         | 0.0 | 0         | 0.0 |     |
| INTERMEDIATE |             |             |             |             | tot     | <b>1</b>  | 0.1 | <b>1</b>  | 0.1 | 1.1 |
|              |             |             |             |             | X       |           |     |           |     |     |
| INTERMEDIATE | <b>0403</b> | <b>0302</b> | <b>0405</b> | <b>0301</b> | I-I     | 1         | 0.1 | 1         | 0.1 |     |
| INTERMEDIATE | <b>0403</b> | <b>0302</b> | <b>0405</b> | <b>0301</b> | I-III   | 0         | 0.0 | 0         | 0.0 |     |
| INTERMEDIATE | <b>0403</b> | <b>0302</b> | <b>0405</b> | <b>0301</b> | III-III | 0         | 0.0 | 0         | 0.0 |     |
| INTERMEDIATE |             |             |             |             | tot     | <b>1</b>  | 0.1 | <b>1</b>  | 0.1 | 1.1 |
|              |             |             |             |             | X       |           |     |           |     |     |
| INTERMEDIATE | <b>0301</b> | <b>0201</b> | <b>01</b>   | <b>0501</b> | I-I     | 27        | 2.9 | 29        | 2.8 |     |
| INTERMEDIATE | <b>0301</b> | <b>0201</b> | <b>01</b>   | <b>0501</b> | I-III   | 7         | 0.7 | 14        | 1.4 |     |
| INTERMEDIATE | <b>0301</b> | <b>0201</b> | <b>01</b>   | <b>0501</b> | III-III | 1         | 0.1 | 0         | 0.0 |     |
| INTERMEDIATE |             |             |             |             | tot     | <b>35</b> | 3.7 | <b>43</b> | 4.2 | 0.9 |
|              |             |             |             |             | X       |           |     |           |     |     |
| INTERMEDIATE | <b>1601</b> | <b>0502</b> | <b>0405</b> | <b>0201</b> | I-I     | 5         | 0.5 | 5         | 0.5 |     |
| INTERMEDIATE | <b>1601</b> | <b>0502</b> | <b>0405</b> | <b>0201</b> | I-III   | 1         | 0.1 | 4         | 0.4 |     |
| INTERMEDIATE | <b>1601</b> | <b>0502</b> | <b>0405</b> | <b>0201</b> | III-III | 0         | 0.0 | 1         | 0.1 |     |
| INTERMEDIATE |             |             |             |             | tot     | <b>6</b>  | 0.6 | <b>10</b> | 1.0 | 0.7 |
|              |             |             |             |             | X       |           |     |           |     |     |
| INTERMEDIATE | <b>04</b>   | <b>0302</b> | <b>0701</b> | <b>0201</b> | I-I     | 2         | 0.2 | 3         | 0.3 |     |
| INTERMEDIATE | <b>04</b>   | <b>0302</b> | <b>0701</b> | <b>0201</b> | I-III   | 1         | 0.1 | 2         | 0.2 |     |
| INTERMEDIATE | <b>04</b>   | <b>0302</b> | <b>0701</b> | <b>0201</b> | III-III | 0         | 0.0 | 0         | 0.0 |     |
| INTERMEDIATE |             |             |             |             | tot     | <b>3</b>  | 0.3 | <b>5</b>  | 0.5 | 0.7 |
|              |             |             |             |             | X       |           |     |           |     |     |
| INTERMEDIATE | <b>04</b>   | <b>0302</b> | <b>10</b>   | <b>0501</b> | I-I     | 1         | 0.1 | 0         | 0.0 |     |
| INTERMEDIATE | <b>04</b>   | <b>0302</b> | <b>10</b>   | <b>0501</b> | I-III   | 0         | 0.0 | 1         | 0.1 |     |
| INTERMEDIATE | <b>04</b>   | <b>0302</b> | <b>10</b>   | <b>0501</b> | III-III | 0         | 0.0 | 1         | 0.1 |     |
| INTERMEDIATE |             |             |             |             | tot     | <b>1</b>  | 0.1 | <b>2</b>  | 0.2 | 0.5 |
|              |             |             |             |             | X       |           |     |           |     |     |

|              |      |      |       |      |         |          |     |           |     |     |
|--------------|------|------|-------|------|---------|----------|-----|-----------|-----|-----|
| INTERMEDIATE | 0301 | 0201 | 1501  | 0602 | I-I     | 1        | 0.1 | 1         | 0.1 |     |
| INTERMEDIATE | 0301 | 0201 | 1501  | 0602 | I-III   | 0        | 0.0 | 1         | 0.1 |     |
| INTERMEDIATE | 0301 | 0201 | 1501  | 0602 | III-III | 0        | 0.0 | 0         | 0.0 |     |
| INTERMEDIATE |      |      |       |      | tot     | <b>1</b> | 0.1 | <b>2</b>  | 0.2 | 0.5 |
|              |      |      |       |      | X       |          |     |           |     |     |
| INTERMEDIATE | 1601 | 0502 | 08    | 0402 | I-I     | 1        | 0.1 | 1         | 0.1 |     |
| INTERMEDIATE | 1601 | 0502 | 08    | 0402 | I-III   | 0        | 0.0 | 1         | 0.1 |     |
| INTERMEDIATE | 1601 | 0502 | 08    | 0402 | III-III | 0        | 0.0 | 0         | 0.0 |     |
| INTERMEDIATE |      |      |       |      | tot     | <b>1</b> | 0.1 | <b>2</b>  | 0.2 | 0.5 |
|              |      |      |       |      | X       |          |     |           |     |     |
| INTERMEDIATE | 0405 | 0301 | 1502  | 0601 | I-I     | 1        | 0.1 | 2         | 0.2 |     |
| INTERMEDIATE | 0405 | 0301 | 1502  | 0601 | I-III   | 0        | 0.0 | 0         | 0.0 |     |
| INTERMEDIATE | 0405 | 0301 | 1502  | 0601 | III-III | 0        | 0.0 | 0         | 0.0 |     |
| INTERMEDIATE |      |      |       |      | tot     | <b>1</b> | 0.1 | <b>2</b>  | 0.2 | 0.5 |
|              |      |      |       |      | X       |          |     |           |     |     |
| INTERMEDIATE | 0403 | 0302 | 0701  | 0201 | I-I     | 1        | 0.1 | 1         | 0.1 |     |
| INTERMEDIATE | 0403 | 0302 | 0701  | 0201 | I-III   | 0        | 0.0 | 0         | 0.0 |     |
| INTERMEDIATE | 0403 | 0302 | 0701  | 0201 | III-III | 0        | 0.0 | 1         | 0.1 |     |
| INTERMEDIATE |      |      |       |      | tot     | <b>1</b> | 0.1 | <b>2</b>  | 0.2 | 0.5 |
|              |      |      |       |      | X       |          |     |           |     |     |
| INTERMEDIATE | 0403 | 0302 | 1401  | 0503 | I-I     | 0        | 0.0 | 1         | 0.1 |     |
| INTERMEDIATE | 0403 | 0302 | 1401  | 0503 | I-III   | 0        | 0.0 | 1         | 0.1 |     |
| INTERMEDIATE | 0403 | 0302 | 1401  | 0503 | III-III | 1        | 0.1 | 0         | 0.0 |     |
| INTERMEDIATE |      |      |       |      | tot     | <b>1</b> | 0.1 | <b>2</b>  | 0.2 | 0.5 |
|              |      |      |       |      | X       |          |     |           |     |     |
| INTERMEDIATE | 0301 | 0201 | 0701  | 0201 | I-I     | 8        | 0.8 | 13        | 1.3 |     |
| INTERMEDIATE | 0301 | 0201 | 0701  | 0201 | I-III   | 1        | 0.1 | 5         | 0.5 |     |
| INTERMEDIATE | 0301 | 0201 | 0701  | 0201 | III-III | 0        | 0.0 | 3         | 0.3 |     |
| INTERMEDIATE |      |      |       |      | tot     | <b>9</b> | 1.0 | <b>21</b> | 2.1 | 0.5 |
|              |      |      |       |      | X       |          |     |           |     |     |
| INTERMEDIATE | 0301 | 0201 | 11-12 | 0502 | I-I     | 0        | 0.0 | 0         | 0.0 |     |
| INTERMEDIATE | 0301 | 0201 | 11-12 | 0502 | I-III   | 0        | 0.0 | 1         | 0.1 |     |
| INTERMEDIATE | 0301 | 0201 | 11-12 | 0502 | III-III | 0        | 0.0 | 0         | 0.0 |     |
| INTERMEDIATE |      |      |       |      | tot     | <b>0</b> | 0.0 | <b>1</b>  | 0.1 | 0.4 |
|              |      |      |       |      | X       |          |     |           |     |     |
| INTERMEDIATE | 0301 | 0201 | 08    | 0402 | I-I     | 1        | 0.1 | 2         | 0.2 |     |
| INTERMEDIATE | 0301 | 0201 | 08    | 0402 | I-III   | 1        | 0.1 | 4         | 0.4 |     |
| INTERMEDIATE | 0301 | 0201 | 08    | 0402 | III-III | 0        | 0.0 | 0         | 0.0 |     |
| INTERMEDIATE |      |      |       |      | tot     | <b>2</b> | 0.2 | <b>6</b>  | 0.6 | 0.4 |
|              |      |      |       |      | X       |          |     |           |     |     |
| INTERMEDIATE | 0301 | 0201 | 1302  | 0603 | I-I     | 0        | 0.0 | 0         | 0.0 |     |

|              |      |      |       |       |         |   |     |   |     |     |
|--------------|------|------|-------|-------|---------|---|-----|---|-----|-----|
| INTERMEDIATE | 0301 | 0201 | 1302  | 0603  | I-III   | 0 | 0.0 | 1 | 0.1 |     |
| INTERMEDIATE | 0301 | 0201 | 1302  | 0603  | III-III | 0 | 0.0 | 0 | 0.0 |     |
| INTERMEDIATE |      |      |       |       | tot     | 0 | 0.0 | 1 | 0.1 | 0.4 |
|              |      |      |       |       | X       |   |     |   |     |     |
| INTERMEDIATE | 0301 | 0201 | 1302  | 0605  | I-I     | 0 | 0.0 | 0 | 0.0 |     |
| INTERMEDIATE | 0301 | 0201 | 1302  | 0605  | I-III   | 0 | 0.0 | 1 | 0.1 |     |
| INTERMEDIATE | 0301 | 0201 | 1302  | 0605  | III-III | 0 | 0.0 | 0 | 0.0 |     |
| INTERMEDIATE |      |      |       |       | tot     | 0 | 0.0 | 1 | 0.1 | 0.4 |
|              |      |      |       |       | X       |   |     |   |     |     |
| INTERMEDIATE | 0301 | 0201 | 1501  | 05-06 | I-I     | 0 | 0.0 | 1 | 0.1 |     |
| INTERMEDIATE | 0301 | 0201 | 1501  | 05-06 | I-III   | 0 | 0.0 | 0 | 0.0 |     |
| INTERMEDIATE | 0301 | 0201 | 1501  | 05-06 | III-III | 0 | 0.0 | 0 | 0.0 |     |
| INTERMEDIATE |      |      |       |       | tot     | 0 | 0.0 | 1 | 0.1 | 0.4 |
|              |      |      |       |       | X       |   |     |   |     |     |
| INTERMEDIATE | 0301 | 0201 | 1502  | 0601  | I-I     | 1 | 0.1 | 3 | 0.3 |     |
| INTERMEDIATE | 0301 | 0201 | 1502  | 0601  | I-III   | 0 | 0.0 | 0 | 0.0 |     |
| INTERMEDIATE | 0301 | 0201 | 1502  | 0601  | III-III | 0 | 0.0 | 0 | 0.0 |     |
| INTERMEDIATE |      |      |       |       | tot     | 1 | 0.1 | 3 | 0.3 | 0.4 |
|              |      |      |       |       | X       |   |     |   |     |     |
| INTERMEDIATE | 0301 | 0301 | 0701  | 0201  | I-I     | 0 | 0.0 | 1 | 0.1 |     |
| INTERMEDIATE | 0301 | 0301 | 0701  | 0201  | I-III   | 0 | 0.0 | 0 | 0.0 |     |
| INTERMEDIATE | 0301 | 0301 | 0701  | 0201  | III-III | 0 | 0.0 | 0 | 0.0 |     |
| INTERMEDIATE |      |      |       |       | tot     | 0 | 0.0 | 1 | 0.1 | 0.4 |
|              |      |      |       |       | X       |   |     |   |     |     |
| INTERMEDIATE | 1601 | 0502 | 0403  | 0305  | I-I     | 0 | 0.0 | 1 | 0.1 |     |
| INTERMEDIATE | 1601 | 0502 | 0403  | 0305  | I-III   | 0 | 0.0 | 0 | 0.0 |     |
| INTERMEDIATE | 1601 | 0502 | 0403  | 0305  | III-III | 0 | 0.0 | 0 | 0.0 |     |
| INTERMEDIATE |      |      |       |       | tot     | 0 | 0.0 | 1 | 0.1 | 0.4 |
|              |      |      |       |       | X       |   |     |   |     |     |
| INTERMEDIATE | 1601 | 0502 | 11-12 | 0201  | I-I     | 0 | 0.0 | 0 | 0.0 |     |
| INTERMEDIATE | 1601 | 0502 | 11-12 | 0201  | I-III   | 0 | 0.0 | 1 | 0.1 |     |
| INTERMEDIATE | 1601 | 0502 | 11-12 | 0201  | III-III | 0 | 0.0 | 0 | 0.0 |     |
| INTERMEDIATE |      |      |       |       | tot     | 0 | 0.0 | 1 | 0.1 | 0.4 |
|              |      |      |       |       | X       |   |     |   |     |     |
| INTERMEDIATE | 1601 | 0502 | 11-12 | 0603  | I-I     | 0 | 0.0 | 1 | 0.1 |     |
| INTERMEDIATE | 1601 | 0502 | 11-12 | 0603  | I-III   | 0 | 0.0 | 0 | 0.0 |     |
| INTERMEDIATE | 1601 | 0502 | 11-12 | 0603  | III-III | 0 | 0.0 | 0 | 0.0 |     |
| INTERMEDIATE |      |      |       |       | tot     | 0 | 0.0 | 1 | 0.1 | 0.4 |
|              |      |      |       |       | X       |   |     |   |     |     |
| INTERMEDIATE | 1601 | 0502 | 1301  | 0604  | I-I     | 0 | 0.0 | 1 | 0.1 |     |
| INTERMEDIATE | 1601 | 0502 | 1301  | 0604  | I-III   | 0 | 0.0 | 0 | 0.0 |     |

|              |      |      |       |      |         |   |     |   |     |     |
|--------------|------|------|-------|------|---------|---|-----|---|-----|-----|
| INTERMEDIATE | 1601 | 0502 | 1301  | 0604 | III-III | 0 | 0.0 | 0 | 0.0 |     |
| INTERMEDIATE |      |      |       |      | tot     | 0 | 0.0 | 1 | 0.1 | 0.4 |
|              |      |      |       |      | X       |   |     |   |     |     |
| INTERMEDIATE | 1601 | 0502 | 1302  | 0301 | I-I     | 0 | 0.0 | 1 | 0.1 |     |
| INTERMEDIATE | 1601 | 0502 | 1302  | 0301 | I-III   | 0 | 0.0 | 0 | 0.0 |     |
| INTERMEDIATE | 1601 | 0502 | 1302  | 0301 | III-III | 0 | 0.0 | 0 | 0.0 |     |
| INTERMEDIATE |      |      |       |      | tot     | 0 | 0.0 | 1 | 0.1 | 0.4 |
|              |      |      |       |      | X       |   |     |   |     |     |
| INTERMEDIATE | 1601 | 0502 | 1501  | 0502 | I-I     | 0 | 0.0 | 1 | 0.1 |     |
| INTERMEDIATE | 1601 | 0502 | 1501  | 0502 | I-III   | 0 | 0.0 | 0 | 0.0 |     |
| INTERMEDIATE | 1601 | 0502 | 1501  | 0502 | III-III | 0 | 0.0 | 0 | 0.0 |     |
| INTERMEDIATE |      |      |       |      | tot     | 0 | 0.0 | 1 | 0.1 | 0.4 |
|              |      |      |       |      | X       |   |     |   |     |     |
| INTERMEDIATE | 1601 | 0502 | 1602  | 0502 | I-I     | 0 | 0.0 | 0 | 0.0 |     |
| INTERMEDIATE | 1601 | 0502 | 1602  | 0502 | I-III   | 0 | 0.0 | 1 | 0.1 |     |
| INTERMEDIATE | 1601 | 0502 | 1602  | 0502 | III-III | 0 | 0.0 | 0 | 0.0 |     |
| INTERMEDIATE |      |      |       |      | tot     | 0 | 0.0 | 1 | 0.1 | 0.4 |
|              |      |      |       |      | X       |   |     |   |     |     |
| INTERMEDIATE | 0405 | 0201 | 0405  | 0201 | I-I     | 0 | 0.0 | 1 | 0.1 |     |
| INTERMEDIATE | 0405 | 0201 | 0405  | 0201 | I-III   | 0 | 0.0 | 0 | 0.0 |     |
| INTERMEDIATE | 0405 | 0201 | 0405  | 0201 | III-III | 0 | 0.0 | 0 | 0.0 |     |
| INTERMEDIATE |      |      |       |      | tot     | 0 | 0.0 | 1 | 0.1 | 0.4 |
|              |      |      |       |      | X       |   |     |   |     |     |
| INTERMEDIATE | 0405 | 0201 | 0403  | 0302 | I-I     | 0 | 0.0 | 1 | 0.1 |     |
| INTERMEDIATE | 0405 | 0201 | 0403  | 0302 | I-III   | 0 | 0.0 | 0 | 0.0 |     |
| INTERMEDIATE | 0405 | 0201 | 0403  | 0302 | III-III | 0 | 0.0 | 0 | 0.0 |     |
| INTERMEDIATE |      |      |       |      | tot     | 0 | 0.0 | 1 | 0.1 | 0.4 |
|              |      |      |       |      | X       |   |     |   |     |     |
| INTERMEDIATE | 0405 | 0201 | 11-12 | 0302 | I-I     | 0 | 0.0 | 1 | 0.1 |     |
| INTERMEDIATE | 0405 | 0201 | 11-12 | 0302 | I-III   | 0 | 0.0 | 0 | 0.0 |     |
| INTERMEDIATE | 0405 | 0201 | 11-12 | 0302 | III-III | 0 | 0.0 | 0 | 0.0 |     |
| INTERMEDIATE |      |      |       |      | tot     | 0 | 0.0 | 1 | 0.1 | 0.4 |
|              |      |      |       |      | X       |   |     |   |     |     |
| INTERMEDIATE | 0405 | 0201 | 1502  | 0601 | I-I     | 0 | 0.0 | 0 | 0.0 |     |
| INTERMEDIATE | 0405 | 0201 | 1502  | 0601 | I-III   | 0 | 0.0 | 0 | 0.0 |     |
| INTERMEDIATE | 0405 | 0201 | 1502  | 0601 | III-III | 0 | 0.0 | 1 | 0.1 |     |
| INTERMEDIATE |      |      |       |      | tot     | 0 | 0.0 | 1 | 0.1 | 0.4 |
|              |      |      |       |      | X       |   |     |   |     |     |
| INTERMEDIATE | 04   | 0302 | 0403  | 0301 | I-I     | 0 | 0.0 | 0 | 0.0 |     |
| INTERMEDIATE | 04   | 0302 | 0403  | 0301 | I-III   | 0 | 0.0 | 1 | 0.1 |     |
| INTERMEDIATE | 04   | 0302 | 0403  | 0301 | III-III | 0 | 0.0 | 0 | 0.0 |     |

|              |      |      |       |      |         |   |     |   |     |     |
|--------------|------|------|-------|------|---------|---|-----|---|-----|-----|
| INTERMEDIATE |      |      |       |      | tot     | 0 | 0.0 | 1 | 0.1 | 0.4 |
|              |      |      |       |      | X       |   |     |   |     |     |
| INTERMEDIATE | 04   | 0302 | 0701  | 0303 | I-I     | 0 | 0.0 | 1 | 0.1 |     |
| INTERMEDIATE | 04   | 0302 | 0701  | 0303 | I-III   | 0 | 0.0 | 0 | 0.0 |     |
| INTERMEDIATE | 04   | 0302 | 0701  | 0303 | III-III | 0 | 0.0 | 0 | 0.0 |     |
| INTERMEDIATE |      |      |       |      | tot     | 0 | 0.0 | 1 | 0.1 | 0.4 |
|              |      |      |       |      | X       |   |     |   |     |     |
| INTERMEDIATE | 04   | 0302 | 1302  | 0602 | I-I     | 0 | 0.0 | 1 | 0.1 |     |
| INTERMEDIATE | 04   | 0302 | 1302  | 0602 | I-III   | 0 | 0.0 | 0 | 0.0 |     |
| INTERMEDIATE | 04   | 0302 | 1302  | 0602 | III-III | 0 | 0.0 | 0 | 0.0 |     |
| INTERMEDIATE |      |      |       |      | tot     | 0 | 0.0 | 1 | 0.1 | 0.4 |
|              |      |      |       |      | X       |   |     |   |     |     |
| INTERMEDIATE | 04   | 0302 | 1501  | 0602 | I-I     | 0 | 0.0 | 1 | 0.1 |     |
| INTERMEDIATE | 04   | 0302 | 1501  | 0602 | I-III   | 0 | 0.0 | 0 | 0.0 |     |
| INTERMEDIATE | 04   | 0302 | 1501  | 0602 | III-III | 0 | 0.0 | 0 | 0.0 |     |
| INTERMEDIATE |      |      |       |      | tot     | 0 | 0.0 | 1 | 0.1 | 0.4 |
|              |      |      |       |      | X       |   |     |   |     |     |
| INTERMEDIATE | 0405 | 0301 | 11-12 | 0603 | I-I     | 0 | 0.0 | 1 | 0.1 |     |
| INTERMEDIATE | 0405 | 0301 | 11-12 | 0603 | I-III   | 0 | 0.0 | 0 | 0.0 |     |
| INTERMEDIATE | 0405 | 0301 | 11-12 | 0603 | III-III | 0 | 0.0 | 0 | 0.0 |     |
| INTERMEDIATE |      |      |       |      | tot     | 0 | 0.0 | 1 | 0.1 | 0.4 |
|              |      |      |       |      | X       |   |     |   |     |     |
| INTERMEDIATE | 0405 | 0301 | 0701  | 0201 | I-I     | 1 | 0.1 | 3 | 0.3 |     |
| INTERMEDIATE | 0405 | 0301 | 0701  | 0201 | I-III   | 0 | 0.0 | 0 | 0.0 |     |
| INTERMEDIATE | 0405 | 0301 | 0701  | 0201 | III-III | 0 | 0.0 | 0 | 0.0 |     |
| INTERMEDIATE |      |      |       |      | tot     | 1 | 0.1 | 3 | 0.3 | 0.4 |
|              |      |      |       |      | X       |   |     |   |     |     |
| INTERMEDIATE | 04   | 0302 | 0402  | 0301 | I-I     | 0 | 0.0 | 0 | 0.0 |     |
| INTERMEDIATE | 04   | 0302 | 0402  | 0301 | I-III   | 0 | 0.0 | 0 | 0.0 |     |
| INTERMEDIATE | 04   | 0302 | 0402  | 0301 | III-III | 0 | 0.0 | 1 | 0.1 |     |
| INTERMEDIATE |      |      |       |      | tot     | 0 | 0.0 | 1 | 0.1 | 0.4 |
|              |      |      |       |      | X       |   |     |   |     |     |
| INTERMEDIATE | 0403 | 0302 | 0403  | 0302 | I-I     | 0 | 0.0 | 0 | 0.0 |     |
| INTERMEDIATE | 0403 | 0302 | 0403  | 0302 | I-III   | 0 | 0.0 | 1 | 0.1 |     |
| INTERMEDIATE | 0403 | 0302 | 0403  | 0302 | III-III | 0 | 0.0 | 0 | 0.0 |     |
| INTERMEDIATE |      |      |       |      | tot     | 0 | 0.0 | 1 | 0.1 | 0.4 |
|              |      |      |       |      | X       |   |     |   |     |     |
| INTERMEDIATE | 0403 | 0302 | 1301  | 0603 | I-I     | 0 | 0.0 | 0 | 0.0 |     |
| INTERMEDIATE | 0403 | 0302 | 1301  | 0603 | I-III   | 0 | 0.0 | 1 | 0.1 |     |
| INTERMEDIATE | 0403 | 0302 | 1301  | 0603 | III-III | 0 | 0.0 | 0 | 0.0 |     |
| INTERMEDIATE |      |      |       |      | tot     | 0 | 0.0 | 1 | 0.1 | 0.4 |

|              |      |      |        |      |         |   |     |   |     |     |
|--------------|------|------|--------|------|---------|---|-----|---|-----|-----|
|              |      |      |        |      | X       |   |     |   |     |     |
| INTERMEDIATE | 0403 | 0302 | 1302   | 0604 | I-I     | 0 | 0.0 | 1 | 0.1 |     |
| INTERMEDIATE | 0403 | 0302 | 1302   | 0604 | I-III   | 0 | 0.0 | 0 | 0.0 |     |
| INTERMEDIATE | 0403 | 0302 | 1302   | 0604 | III-III | 0 | 0.0 | 0 | 0.0 |     |
| INTERMEDIATE |      |      |        |      | tot     | 0 | 0.0 | 1 | 0.1 | 0.4 |
|              |      |      |        |      | X       |   |     |   |     |     |
| INTERMEDIATE | 0403 | 0301 | 01     | 0501 | I-I     | 0 | 0.0 | 1 | 0.1 |     |
| INTERMEDIATE | 0403 | 0301 | 01     | 0501 | I-III   | 0 | 0.0 | 0 | 0.0 |     |
| INTERMEDIATE | 0403 | 0301 | 01     | 0501 | III-III | 0 | 0.0 | 0 | 0.0 |     |
| INTERMEDIATE |      |      |        |      | tot     | 0 | 0.0 | 1 | 0.1 | 0.4 |
|              |      |      |        |      | X       |   |     |   |     |     |
| INTERMEDIATE | 0403 | 0304 | 0403   | 0305 | I-I     | 0 | 0.0 | 1 | 0.1 |     |
| INTERMEDIATE | 0403 | 0304 | 0403   | 0305 | I-III   | 0 | 0.0 | 0 | 0.0 |     |
| INTERMEDIATE | 0403 | 0304 | 0403   | 0305 | III-III | 0 | 0.0 | 0 | 0.0 |     |
| INTERMEDIATE |      |      |        |      | tot     | 0 | 0.0 | 1 | 0.1 | 0.4 |
|              |      |      |        |      | X       |   |     |   |     |     |
| INTERMEDIATE | 0403 | 0304 | 1303-5 | 0301 | I-I     | 0 | 0.0 | 0 | 0.0 |     |
| INTERMEDIATE | 0403 | 0304 | 1303-5 | 0301 | I-III   | 0 | 0.0 | 1 | 0.1 |     |
| INTERMEDIATE | 0403 | 0304 | 1303-5 | 0301 | III-III | 0 | 0.0 | 0 | 0.0 |     |
| INTERMEDIATE |      |      |        |      | tot     | 0 | 0.0 | 1 | 0.1 | 0.4 |
|              |      |      |        |      | X       |   |     |   |     |     |
| INTERMEDIATE | 0403 | 0304 | 1501   | 0602 | I-I     | 0 | 0.0 | 1 | 0.1 |     |
| INTERMEDIATE | 0403 | 0304 | 1501   | 0602 | I-III   | 0 | 0.0 | 0 | 0.0 |     |
| INTERMEDIATE | 0403 | 0304 | 1501   | 0602 | III-III | 0 | 0.0 | 0 | 0.0 |     |
| INTERMEDIATE |      |      |        |      | tot     | 0 | 0.0 | 1 | 0.1 | 0.4 |
|              |      |      |        |      | X       |   |     |   |     |     |
| INTERMEDIATE | 0401 | 0301 | 1501   | 0601 | I-I     | 0 | 0.0 | 0 | 0.0 |     |
| INTERMEDIATE | 0401 | 0301 | 1501   | 0601 | I-III   | 0 | 0.0 | 1 | 0.1 |     |
| INTERMEDIATE | 0401 | 0301 | 1501   | 0601 | III-III | 0 | 0.0 | 0 | 0.0 |     |
| INTERMEDIATE |      |      |        |      | tot     | 0 | 0.0 | 1 | 0.1 | 0.4 |
|              |      |      |        |      | X       |   |     |   |     |     |
| INTERMEDIATE | 0407 | 0301 | 11-12  | 0301 | I-I     | 0 | 0.0 | 0 | 0.0 |     |
| INTERMEDIATE | 0407 | 0301 | 11-12  | 0301 | I-III   | 0 | 0.0 | 1 | 0.1 |     |
| INTERMEDIATE | 0407 | 0301 | 11-12  | 0301 | III-III | 0 | 0.0 | 0 | 0.0 |     |
| INTERMEDIATE |      |      |        |      | tot     | 0 | 0.0 | 1 | 0.1 | 0.4 |
|              |      |      |        |      | X       |   |     |   |     |     |
| INTERMEDIATE | 0407 | 0301 | 0701   | 0303 | I-I     | 0 | 0.0 | 0 | 0.0 |     |
| INTERMEDIATE | 0407 | 0301 | 0701   | 0303 | I-III   | 0 | 0.0 | 1 | 0.1 |     |
| INTERMEDIATE | 0407 | 0301 | 0701   | 0303 | III-III | 0 | 0.0 | 0 | 0.0 |     |
| INTERMEDIATE |      |      |        |      | tot     | 0 | 0.0 | 1 | 0.1 | 0.4 |
|              |      |      |        |      | X       |   |     |   |     |     |

|              |       |      |        |      |         |   |     |   |     |     |
|--------------|-------|------|--------|------|---------|---|-----|---|-----|-----|
| INTERMEDIATE | 01    | 0501 | 11-12  | 0502 | I-I     | 0 | 0.0 | 1 | 0.1 |     |
| INTERMEDIATE | 01    | 0501 | 11-12  | 0502 | I-III   | 0 | 0.0 | 0 | 0.0 |     |
| INTERMEDIATE | 01    | 0501 | 11-12  | 0502 | III-III | 0 | 0.0 | 0 | 0.0 |     |
| INTERMEDIATE |       |      |        |      | tot     | 0 | 0.0 | 1 | 0.1 | 0.4 |
|              |       |      |        |      | X       |   |     |   |     |     |
| INTERMEDIATE | 01    | 0501 | 0701   | 0303 | I-I     | 0 | 0.0 | 0 | 0.0 |     |
| INTERMEDIATE | 01    | 0501 | 0701   | 0303 | I-III   | 0 | 0.0 | 0 | 0.0 |     |
| INTERMEDIATE | 01    | 0501 | 0701   | 0303 | III-III | 0 | 0.0 | 1 | 0.1 |     |
| INTERMEDIATE |       |      |        |      | tot     | 0 | 0.0 | 1 | 0.1 | 0.4 |
|              |       |      |        |      | X       |   |     |   |     |     |
| INTERMEDIATE | 01    | 0501 | 1301   | 0602 | I-I     | 0 | 0.0 | 1 | 0.1 |     |
| INTERMEDIATE | 01    | 0501 | 1301   | 0602 | I-III   | 0 | 0.0 | 0 | 0.0 |     |
| INTERMEDIATE | 01    | 0501 | 1301   | 0602 | III-III | 0 | 0.0 | 0 | 0.0 |     |
| INTERMEDIATE |       |      |        |      | tot     | 0 | 0.0 | 1 | 0.1 | 0.4 |
|              |       |      |        |      | X       |   |     |   |     |     |
| INTERMEDIATE | 01    | 0501 | 1303-5 | 0301 | I-I     | 0 | 0.0 | 0 | 0.0 |     |
| INTERMEDIATE | 01    | 0501 | 1303-5 | 0301 | I-III   | 0 | 0.0 | 1 | 0.1 |     |
| INTERMEDIATE | 01    | 0501 | 1303-5 | 0301 | III-III | 0 | 0.0 | 0 | 0.0 |     |
| INTERMEDIATE |       |      |        |      | tot     | 0 | 0.0 | 1 | 0.1 | 0.4 |
|              |       |      |        |      | X       |   |     |   |     |     |
| INTERMEDIATE | 01    | 0501 | 1602   | 0603 | I-I     | 0 | 0.0 | 1 | 0.1 |     |
| INTERMEDIATE | 01    | 0501 | 1602   | 0603 | I-III   | 0 | 0.0 | 0 | 0.0 |     |
| INTERMEDIATE | 01    | 0501 | 1602   | 0603 | III-III | 0 | 0.0 | 0 | 0.0 |     |
| INTERMEDIATE |       |      |        |      | tot     | 0 | 0.0 | 1 | 0.1 | 0.4 |
|              |       |      |        |      | X       |   |     |   |     |     |
| INTERMEDIATE | 10    | 0501 | 0405   | 0201 | I-I     | 0 | 0.0 | 1 | 0.1 |     |
| INTERMEDIATE | 10    | 0501 | 0405   | 0201 | I-III   | 0 | 0.0 | 0 | 0.0 |     |
| INTERMEDIATE | 10    | 0501 | 0405   | 0201 | III-III | 0 | 0.0 | 0 | 0.0 |     |
| INTERMEDIATE |       |      |        |      | tot     | 0 | 0.0 | 1 | 0.1 | 0.4 |
|              |       |      |        |      | X       |   |     |   |     |     |
| INTERMEDIATE | 10    | 0501 | 1502   | 0601 | I-I     | 0 | 0.0 | 1 | 0.1 |     |
| INTERMEDIATE | 10    | 0501 | 1502   | 0601 | I-III   | 0 | 0.0 | 0 | 0.0 |     |
| INTERMEDIATE | 10    | 0501 | 1502   | 0601 | III-III | 0 | 0.0 | 0 | 0.0 |     |
| INTERMEDIATE |       |      |        |      | tot     | 0 | 0.0 | 1 | 0.1 | 0.4 |
|              |       |      |        |      | X       |   |     |   |     |     |
| INTERMEDIATE | 11-12 | 0301 | 0301   | 0301 | I-I     | 0 | 0.0 | 0 | 0.0 |     |
| INTERMEDIATE | 11-12 | 0301 | 0301   | 0301 | I-III   | 0 | 0.0 | 1 | 0.1 |     |
| INTERMEDIATE | 11-12 | 0301 | 0301   | 0301 | III-III | 0 | 0.0 | 0 | 0.0 |     |
| INTERMEDIATE |       |      |        |      | tot     | 0 | 0.0 | 1 | 0.1 | 0.4 |
|              |       |      |        |      | X       |   |     |   |     |     |
| INTERMEDIATE | 11-12 | 0301 | 1601   | 0501 | I-I     | 0 | 0.0 | 0 | 0.0 |     |

|              |       |      |       |      |         |   |     |   |     |     |
|--------------|-------|------|-------|------|---------|---|-----|---|-----|-----|
| INTERMEDIATE | 11-12 | 0301 | 1601  | 0501 | I-III   | 0 | 0.0 | 1 | 0.1 |     |
| INTERMEDIATE | 11-12 | 0301 | 1601  | 0501 | III-III | 0 | 0.0 | 0 | 0.0 |     |
| INTERMEDIATE |       |      |       |      | tot     | 0 | 0.0 | 1 | 0.1 | 0.4 |
|              |       |      |       |      | X       |   |     |   |     |     |
| INTERMEDIATE | 11-12 | 0301 | 11-12 | 0302 | I-I     | 0 | 0.0 | 1 | 0.1 |     |
| INTERMEDIATE | 11-12 | 0301 | 11-12 | 0302 | I-III   | 0 | 0.0 | 0 | 0.0 |     |
| INTERMEDIATE | 11-12 | 0301 | 11-12 | 0302 | III-III | 0 | 0.0 | 0 | 0.0 |     |
| INTERMEDIATE |       |      |       |      | tot     | 0 | 0.0 | 1 | 0.1 | 0.4 |
|              |       |      |       |      | X       |   |     |   |     |     |
| INTERMEDIATE | 11-12 | 0301 | 11-12 | 0603 | I-I     | 0 | 0.0 | 1 | 0.1 |     |
| INTERMEDIATE | 11-12 | 0301 | 11-12 | 0603 | I-III   | 0 | 0.0 | 0 | 0.0 |     |
| INTERMEDIATE | 11-12 | 0301 | 11-12 | 0603 | III-III | 0 | 0.0 | 0 | 0.0 |     |
| INTERMEDIATE |       |      |       |      | tot     | 0 | 0.0 | 1 | 0.1 | 0.4 |
|              |       |      |       |      | X       |   |     |   |     |     |
| INTERMEDIATE | 11-12 | 0301 | 1302  | 0501 | I-I     | 0 | 0.0 | 0 | 0.0 |     |
| INTERMEDIATE | 11-12 | 0301 | 1302  | 0501 | I-III   | 0 | 0.0 | 1 | 0.1 |     |
| INTERMEDIATE | 11-12 | 0301 | 1302  | 0501 | III-III | 0 | 0.0 | 0 | 0.0 |     |
| INTERMEDIATE |       |      |       |      | tot     | 0 | 0.0 | 1 | 0.1 | 0.4 |
|              |       |      |       |      | X       |   |     |   |     |     |
| INTERMEDIATE | 11-12 | 0301 | 1501  | 0502 | I-I     | 0 | 0.0 | 0 | 0.0 |     |
| INTERMEDIATE | 11-12 | 0301 | 1501  | 0502 | I-III   | 0 | 0.0 | 1 | 0.1 |     |
| INTERMEDIATE | 11-12 | 0301 | 1501  | 0502 | III-III | 0 | 0.0 | 0 | 0.0 |     |
| INTERMEDIATE |       |      |       |      | tot     | 0 | 0.0 | 1 | 0.1 | 0.4 |
|              |       |      |       |      | X       |   |     |   |     |     |
| INTERMEDIATE | 11-12 | 0301 | 1501  | 0603 | I-I     | 0 | 0.0 | 0 | 0.0 |     |
| INTERMEDIATE | 11-12 | 0301 | 1501  | 0603 | I-III   | 0 | 0.0 | 1 | 0.1 |     |
| INTERMEDIATE | 11-12 | 0301 | 1501  | 0603 | III-III | 0 | 0.0 | 0 | 0.0 |     |
| INTERMEDIATE |       |      |       |      | tot     | 0 | 0.0 | 1 | 0.1 | 0.4 |
|              |       |      |       |      | X       |   |     |   |     |     |
| INTERMEDIATE | 11-12 | 0301 | 1501  | 0601 | I-I     | 0 | 0.0 | 1 | 0.1 |     |
| INTERMEDIATE | 11-12 | 0301 | 1501  | 0601 | I-III   | 0 | 0.0 | 0 | 0.0 |     |
| INTERMEDIATE | 11-12 | 0301 | 1501  | 0601 | III-III | 0 | 0.0 | 0 | 0.0 |     |
| INTERMEDIATE |       |      |       |      | tot     | 0 | 0.0 | 1 | 0.1 | 0.4 |
|              |       |      |       |      | X       |   |     |   |     |     |
| INTERMEDIATE | 11-12 | 0301 | 1502  | 0503 | I-I     | 0 | 0.0 | 0 | 0.0 |     |
| INTERMEDIATE | 11-12 | 0301 | 1502  | 0503 | I-III   | 0 | 0.0 | 1 | 0.1 |     |
| INTERMEDIATE | 11-12 | 0301 | 1502  | 0503 | III-III | 0 | 0.0 | 0 | 0.0 |     |
| INTERMEDIATE |       |      |       |      | tot     | 0 | 0.0 | 1 | 0.1 | 0.4 |
|              |       |      |       |      | X       |   |     |   |     |     |
| INTERMEDIATE | 11-12 | 0301 | 1602  | 0502 | I-I     | 0 | 0.0 | 1 | 0.1 |     |
| INTERMEDIATE | 11-12 | 0301 | 1602  | 0502 | I-III   | 0 | 0.0 | 0 | 0.0 |     |

|              |       |      |      |      |         |   |     |   |     |     |
|--------------|-------|------|------|------|---------|---|-----|---|-----|-----|
| INTERMEDIATE | 11-12 | 0301 | 1602 | 0502 | III-III | 0 | 0.0 | 0 | 0.0 |     |
| INTERMEDIATE |       |      |      |      | tot     | 0 | 0.0 | 1 | 0.1 | 0.4 |
|              |       |      |      |      | X       |   |     |   |     |     |
| INTERMEDIATE | 11-12 | 0603 | 01   | 0501 | I-I     | 0 | 0.0 | 1 | 0.1 |     |
| INTERMEDIATE | 11-12 | 0603 | 01   | 0501 | I-III   | 0 | 0.0 | 0 | 0.0 |     |
| INTERMEDIATE | 11-12 | 0603 | 01   | 0501 | III-III | 0 | 0.0 | 0 | 0.0 |     |
| INTERMEDIATE |       |      |      |      | tot     | 0 | 0.0 | 1 | 0.1 | 0.4 |
|              |       |      |      |      | X       |   |     |   |     |     |
| INTERMEDIATE | 0701  | 0201 | 0403 | 0305 | I-I     | 0 | 0.0 | 1 | 0.1 |     |
| INTERMEDIATE | 0701  | 0201 | 0403 | 0305 | I-III   | 0 | 0.0 | 0 | 0.0 |     |
| INTERMEDIATE | 0701  | 0201 | 0403 | 0305 | III-III | 0 | 0.0 | 0 | 0.0 |     |
| INTERMEDIATE |       |      |      |      | tot     | 0 | 0.0 | 1 | 0.1 | 0.4 |
|              |       |      |      |      | X       |   |     |   |     |     |
| INTERMEDIATE | 0701  | 0201 | 1401 | 0503 | I-I     | 0 | 0.0 | 0 | 0.0 |     |
| INTERMEDIATE | 0701  | 0201 | 1401 | 0503 | I-III   | 0 | 0.0 | 0 | 0.0 |     |
| INTERMEDIATE | 0701  | 0201 | 1401 | 0503 | III-III | 0 | 0.0 | 1 | 0.1 |     |
| INTERMEDIATE |       |      |      |      | tot     | 0 | 0.0 | 1 | 0.1 | 0.4 |
|              |       |      |      |      | X       |   |     |   |     |     |
| INTERMEDIATE | 0701  | 0201 | 1502 | 0601 | I-I     | 0 | 0.0 | 0 | 0.0 |     |
| INTERMEDIATE | 0701  | 0201 | 1502 | 0601 | I-III   | 0 | 0.0 | 1 | 0.1 |     |
| INTERMEDIATE | 0701  | 0201 | 1502 | 0601 | III-III | 0 | 0.0 | 0 | 0.0 |     |
| INTERMEDIATE |       |      |      |      | tot     | 0 | 0.0 | 1 | 0.1 | 0.4 |
|              |       |      |      |      | X       |   |     |   |     |     |
| INTERMEDIATE | 0701  | 0303 | 0405 | 0301 | I-I     | 0 | 0.0 | 1 | 0.1 |     |
| INTERMEDIATE | 0701  | 0303 | 0405 | 0301 | I-III   | 0 | 0.0 | 0 | 0.0 |     |
| INTERMEDIATE | 0701  | 0303 | 0405 | 0301 | III-III | 0 | 0.0 | 0 | 0.0 |     |
| INTERMEDIATE |       |      |      |      | tot     | 0 | 0.0 | 1 | 0.1 | 0.4 |
|              |       |      |      |      | X       |   |     |   |     |     |
| INTERMEDIATE | 0701  | 0303 | 0405 | 0304 | I-I     | 0 | 0.0 | 1 | 0.1 |     |
| INTERMEDIATE | 0701  | 0303 | 0405 | 0304 | I-III   | 0 | 0.0 | 0 | 0.0 |     |
| INTERMEDIATE | 0701  | 0303 | 0405 | 0304 | III-III | 0 | 0.0 | 0 | 0.0 |     |
| INTERMEDIATE |       |      |      |      | tot     | 0 | 0.0 | 1 | 0.1 | 0.4 |
|              |       |      |      |      | X       |   |     |   |     |     |
| INTERMEDIATE | 0701  | 0303 | 1401 | 0503 | I-I     | 0 | 0.0 | 1 | 0.1 |     |
| INTERMEDIATE | 0701  | 0303 | 1401 | 0503 | I-III   | 0 | 0.0 | 0 | 0.0 |     |
| INTERMEDIATE | 0701  | 0303 | 1401 | 0503 | III-III | 0 | 0.0 | 0 | 0.0 |     |
| INTERMEDIATE |       |      |      |      | tot     | 0 | 0.0 | 1 | 0.1 | 0.4 |
|              |       |      |      |      | X       |   |     |   |     |     |
| INTERMEDIATE | 08    | 0402 | 0701 | 0201 | I-I     | 0 | 0.0 | 1 | 0.1 |     |
| INTERMEDIATE | 08    | 0402 | 0701 | 0201 | I-III   | 0 | 0.0 | 0 | 0.0 |     |
| INTERMEDIATE | 08    | 0402 | 0701 | 0201 | III-III | 0 | 0.0 | 0 | 0.0 |     |

|              |      |      |      |      |         |   |     |   |     |     |
|--------------|------|------|------|------|---------|---|-----|---|-----|-----|
| INTERMEDIATE |      |      |      |      | tot     | 0 | 0.0 | 1 | 0.1 | 0.4 |
|              |      |      |      |      | X       |   |     |   |     |     |
| INTERMEDIATE | 08   | 0402 | 1302 | 0605 | I-I     | 0 | 0.0 | 1 | 0.1 |     |
| INTERMEDIATE | 08   | 0402 | 1302 | 0605 | I-III   | 0 | 0.0 | 0 | 0.0 |     |
| INTERMEDIATE | 08   | 0402 | 1302 | 0605 | III-III | 0 | 0.0 | 0 | 0.0 |     |
| INTERMEDIATE |      |      |      |      | tot     | 0 | 0.0 | 1 | 0.1 | 0.4 |
|              |      |      |      |      | X       |   |     |   |     |     |
| INTERMEDIATE | 1301 | 0303 | 0301 | 0201 | I-I     | 0 | 0.0 | 0 | 0.0 |     |
| INTERMEDIATE | 1301 | 0303 | 0301 | 0201 | I-III   | 0 | 0.0 | 0 | 0.0 |     |
| INTERMEDIATE | 1301 | 0303 | 0301 | 0201 | III-III | 0 | 0.0 | 1 | 0.1 |     |
| INTERMEDIATE |      |      |      |      | tot     | 0 | 0.0 | 1 | 0.1 | 0.4 |
|              |      |      |      |      | X       |   |     |   |     |     |
| INTERMEDIATE | 1301 | 0603 | 0405 | 0301 | I-I     | 0 | 0.0 | 0 | 0.0 |     |
| INTERMEDIATE | 1301 | 0603 | 0405 | 0301 | I-III   | 0 | 0.0 | 1 | 0.1 |     |
| INTERMEDIATE | 1301 | 0603 | 0405 | 0301 | III-III | 0 | 0.0 | 0 | 0.0 |     |
| INTERMEDIATE |      |      |      |      | tot     | 0 | 0.0 | 1 | 0.1 | 0.4 |
|              |      |      |      |      | X       |   |     |   |     |     |
| INTERMEDIATE | 1301 | 0603 | 1302 | 0604 | I-I     | 0 | 0.0 | 1 | 0.1 |     |
| INTERMEDIATE | 1301 | 0603 | 1302 | 0604 | I-III   | 0 | 0.0 | 0 | 0.0 |     |
| INTERMEDIATE | 1301 | 0603 | 1302 | 0604 | III-III | 0 | 0.0 | 0 | 0.0 |     |
| INTERMEDIATE |      |      |      |      | tot     | 0 | 0.0 | 1 | 0.1 | 0.4 |
|              |      |      |      |      | X       |   |     |   |     |     |
| INTERMEDIATE | 1301 | 0603 | 1502 | 0601 | I-I     | 0 | 0.0 | 0 | 0.0 |     |
| INTERMEDIATE | 1301 | 0603 | 1502 | 0601 | I-III   | 0 | 0.0 | 1 | 0.1 |     |
| INTERMEDIATE | 1301 | 0603 | 1502 | 0601 | III-III | 0 | 0.0 | 0 | 0.0 |     |
| INTERMEDIATE |      |      |      |      | tot     | 0 | 0.0 | 1 | 0.1 | 0.4 |
|              |      |      |      |      | X       |   |     |   |     |     |
| INTERMEDIATE | 1301 | 0603 | 130  | 0605 | I-I     | 0 | 0.0 | 1 | 0.1 |     |
| INTERMEDIATE | 1301 | 0603 | 130  | 0605 | I-III   | 0 | 0.0 | 0 | 0.0 |     |
| INTERMEDIATE | 1301 | 0603 | 130  | 0605 | III-III | 0 | 0.0 | 0 | 0.0 |     |
| INTERMEDIATE |      |      |      |      | tot     | 0 | 0.0 | 1 | 0.1 | 0.4 |
|              |      |      |      |      | X       |   |     |   |     |     |
| INTERMEDIATE | 1301 | 0604 | 08   | 0402 | I-I     | 0 | 0.0 | 1 | 0.1 |     |
| INTERMEDIATE | 1301 | 0604 | 08   | 0402 | I-III   | 0 | 0.0 | 0 | 0.0 |     |
| INTERMEDIATE | 1301 | 0604 | 08   | 0402 | III-III | 0 | 0.0 | 0 | 0.0 |     |
| INTERMEDIATE |      |      |      |      | tot     | 0 | 0.0 | 1 | 0.1 | 0.4 |
|              |      |      |      |      | X       |   |     |   |     |     |
| INTERMEDIATE | 1302 | 0301 | 08   | 0402 | I-I     | 0 | 0.0 | 0 | 0.0 |     |
| INTERMEDIATE | 1302 | 0301 | 08   | 0402 | I-III   | 0 | 0.0 | 1 | 0.1 |     |
| INTERMEDIATE | 1302 | 0301 | 08   | 0402 | III-III | 0 | 0.0 | 0 | 0.0 |     |
| INTERMEDIATE |      |      |      |      | tot     | 0 | 0.0 | 1 | 0.1 | 0.4 |

|              |        |      |      |      |         |   |     |   |     |     |
|--------------|--------|------|------|------|---------|---|-----|---|-----|-----|
|              |        |      |      |      | X       |   |     |   |     |     |
| INTERMEDIATE | 1302   | 0501 | 01   | 0501 | I-I     | 0 | 0.0 | 0 | 0.0 |     |
| INTERMEDIATE | 1302   | 0501 | 01   | 0501 | I-III   | 0 | 0.0 | 1 | 0.1 |     |
| INTERMEDIATE | 1302   | 0501 | 01   | 0501 | III-III | 0 | 0.0 | 0 | 0.0 |     |
| INTERMEDIATE |        |      |      |      | tot     | 0 | 0.0 | 1 | 0.1 | 0.4 |
|              |        |      |      |      | X       |   |     |   |     |     |
| INTERMEDIATE | 1302   | 0604 | 1501 | 0602 | I-I     | 0 | 0.0 | 0 | 0.0 |     |
| INTERMEDIATE | 1302   | 0604 | 1501 | 0602 | I-III   | 0 | 0.0 | 1 | 0.1 |     |
| INTERMEDIATE | 1302   | 0604 | 1501 | 0602 | III-III | 0 | 0.0 | 0 | 0.0 |     |
| INTERMEDIATE |        |      |      |      | tot     | 0 | 0.0 | 1 | 0.1 | 0.4 |
|              |        |      |      |      | X       |   |     |   |     |     |
| INTERMEDIATE | 1302   | 0605 | 0405 | 0301 | I-I     | 0 | 0.0 | 1 | 0.1 |     |
| INTERMEDIATE | 1302   | 0605 | 0405 | 0301 | I-III   | 0 | 0.0 | 0 | 0.0 |     |
| INTERMEDIATE | 1302   | 0605 | 0405 | 0301 | III-III | 0 | 0.0 | 0 | 0.0 |     |
| INTERMEDIATE |        |      |      |      | tot     | 0 | 0.0 | 1 | 0.1 | 0.4 |
|              |        |      |      |      | X       |   |     |   |     |     |
| INTERMEDIATE | 1303-5 | 0301 | 0701 | 0201 | I-I     | 0 | 0.0 | 1 | 0.1 |     |
| INTERMEDIATE | 1303-5 | 0301 | 0701 | 0201 | I-III   | 0 | 0.0 | 0 | 0.0 |     |
| INTERMEDIATE | 1303-5 | 0301 | 0701 | 0201 | III-III | 0 | 0.0 | 0 | 0.0 |     |
| INTERMEDIATE |        |      |      |      | tot     | 0 | 0.0 | 1 | 0.1 | 0.4 |
|              |        |      |      |      | X       |   |     |   |     |     |
| INTERMEDIATE | 1303-5 | 0301 | 1401 | 0503 | I-I     | 0 | 0.0 | 0 | 0.0 |     |
| INTERMEDIATE | 1303-5 | 0301 | 1401 | 0503 | I-III   | 0 | 0.0 | 1 | 0.1 |     |
| INTERMEDIATE | 1303-5 | 0301 | 1401 | 0503 | III-III | 0 | 0.0 | 0 | 0.0 |     |
| INTERMEDIATE |        |      |      |      | tot     | 0 | 0.0 | 1 | 0.1 | 0.4 |
|              |        |      |      |      | X       |   |     |   |     |     |
| INTERMEDIATE | 1401   | 0501 | 1601 | 0502 | I-I     | 0 | 0.0 | 1 | 0.1 |     |
| INTERMEDIATE | 1401   | 0501 | 1601 | 0502 | I-III   | 0 | 0.0 | 0 | 0.0 |     |
| INTERMEDIATE | 1401   | 0501 | 1601 | 0502 | III-III | 0 | 0.0 | 0 | 0.0 |     |
| INTERMEDIATE |        |      |      |      | tot     | 0 | 0.0 | 1 | 0.1 | 0.4 |
|              |        |      |      |      | X       |   |     |   |     |     |
| INTERMEDIATE | 1401   | 0503 | 1401 | 0503 | I-I     | 0 | 0.0 | 1 | 0.1 |     |
| INTERMEDIATE | 1401   | 0503 | 1401 | 0503 | I-III   | 0 | 0.0 | 0 | 0.0 |     |
| INTERMEDIATE | 1401   | 0503 | 1401 | 0503 | III-III | 0 | 0.0 | 0 | 0.0 |     |
| INTERMEDIATE |        |      |      |      | tot     | 0 | 0.0 | 1 | 0.1 | 0.4 |
|              |        |      |      |      | X       |   |     |   |     |     |
| INTERMEDIATE | 1401   | 0503 | 1501 | 0602 | I-I     | 0 | 0.0 | 1 | 0.1 |     |
| INTERMEDIATE | 1401   | 0503 | 1501 | 0602 | I-III   | 0 | 0.0 | 0 | 0.0 |     |
| INTERMEDIATE | 1401   | 0503 | 1501 | 0602 | III-III | 0 | 0.0 | 0 | 0.0 |     |
| INTERMEDIATE |        |      |      |      | tot     | 0 | 0.0 | 1 | 0.1 | 0.4 |
|              |        |      |      |      | X       |   |     |   |     |     |

|              |      |      |      |      |         |   |     |    |     |     |
|--------------|------|------|------|------|---------|---|-----|----|-----|-----|
| INTERMEDIATE | 0901 | 0303 | 1601 | 0502 | I-I     | 0 | 0.0 | 1  | 0.1 |     |
| INTERMEDIATE | 0901 | 0303 | 1601 | 0502 | I-III   | 0 | 0.0 | 0  | 0.0 |     |
| INTERMEDIATE | 0901 | 0303 | 1601 | 0502 | III-III | 0 | 0.0 | 0  | 0.0 |     |
| INTERMEDIATE |      |      |      |      | tot     | 0 | 0.0 | 1  | 0.1 | 0.4 |
|              |      |      |      |      | X       |   |     |    |     |     |
| INTERMEDIATE | 0901 | 0303 | 01   | 0501 | I-I     | 0 | 0.0 | 0  | 0.0 |     |
| INTERMEDIATE | 0901 | 0303 | 01   | 0501 | I-III   | 0 | 0.0 | 0  | 0.0 |     |
| INTERMEDIATE | 0901 | 0303 | 01   | 0501 | III-III | 0 | 0.0 | 1  | 0.1 |     |
| INTERMEDIATE |      |      |      |      | tot     | 0 | 0.0 | 1  | 0.1 | 0.4 |
|              |      |      |      |      | X       |   |     |    |     |     |
| INTERMEDIATE | 1501 | 0503 | 0701 | 0201 | I-I     | 0 | 0.0 | 0  | 0.0 |     |
| INTERMEDIATE | 1501 | 0503 | 0701 | 0201 | I-III   | 0 | 0.0 | 1  | 0.1 |     |
| INTERMEDIATE | 1501 | 0503 | 0701 | 0201 | III-III | 0 | 0.0 | 0  | 0.0 |     |
| INTERMEDIATE |      |      |      |      | tot     | 0 | 0.0 | 1  | 0.1 | 0.4 |
|              |      |      |      |      | X       |   |     |    |     |     |
| INTERMEDIATE | 150  | 060  | 1601 | 0502 | I-I     | 0 | 0.0 | 0  | 0.0 |     |
| INTERMEDIATE | 150  | 060  | 1601 | 0502 | I-III   | 0 | 0.0 | 1  | 0.1 |     |
| INTERMEDIATE | 150  | 060  | 1601 | 0502 | III-III | 0 | 0.0 | 0  | 0.0 |     |
| INTERMEDIATE |      |      |      |      | tot     | 0 | 0.0 | 1  | 0.1 | 0.4 |
|              |      |      |      |      | X       |   |     |    |     |     |
| INTERMEDIATE | 10   | 0501 | 1501 | 0501 | I-I     | 0 | 0.0 | 0  | 0.0 |     |
| INTERMEDIATE | 10   | 0501 | 1501 | 0501 | I-III   | 0 | 0.0 | 1  | 0.1 |     |
| INTERMEDIATE | 10   | 0501 | 1501 | 0501 | III-III | 0 | 0.0 | 0  | 0.0 |     |
| INTERMEDIATE |      |      |      |      | tot     | 0 | 0.0 | 1  | 0.1 | 0.4 |
|              |      |      |      |      | X       |   |     |    |     |     |
| INTERMEDIATE | 10   | 0501 | 1501 | 0602 | I-I     | 0 | 0.0 | 1  | 0.1 |     |
| INTERMEDIATE | 10   | 0501 | 1501 | 0602 | I-III   | 0 | 0.0 | 0  | 0.0 |     |
| INTERMEDIATE | 10   | 0501 | 1501 | 0602 | III-III | 0 | 0.0 | 0  | 0.0 |     |
| INTERMEDIATE |      |      |      |      | tot     | 0 | 0.0 | 1  | 0.1 | 0.4 |
|              |      |      |      |      | X       |   |     |    |     |     |
| LOW          | 1601 | 0502 | 01   | 0501 | I-I     | 7 | 0.7 | 22 | 2.2 |     |
| LOW          | 1601 | 0502 | 01   | 0501 | I-III   | 0 | 0.0 | 7  | 0.7 |     |
| LOW          | 1601 | 0502 | 01   | 0501 | III-III | 1 | 0.1 | 1  | 0.1 |     |
| LOW          |      |      |      |      | tot     | 8 | 0.8 | 30 | 2.9 | 0.3 |
|              |      |      |      |      | X       |   |     |    |     |     |
| LOW          | 0301 | 0201 | 0403 | 0304 | I-I     | 2 | 0.2 | 7  | 0.7 |     |
| LOW          | 0301 | 0201 | 0403 | 0304 | I-III   | 0 | 0.0 | 1  | 0.1 |     |
| LOW          | 0301 | 0201 | 0403 | 0304 | III-III | 0 | 0.0 | 0  | 0.0 |     |
| LOW          |      |      |      |      | tot     | 2 | 0.2 | 8  | 0.8 | 0.3 |
|              |      |      |      |      | X       |   |     |    |     |     |
| LOW          | 0301 | 0201 | 10   | 0501 | I-I     | 2 | 0.2 | 7  | 0.7 |     |

|     |             |             |              |             |         |          |            |           |            |            |
|-----|-------------|-------------|--------------|-------------|---------|----------|------------|-----------|------------|------------|
| LOW | <b>0301</b> | <b>0201</b> | <b>10</b>    | <b>0501</b> | I-III   | 1        | 0.1        | 5         | 0.5        |            |
| LOW | <b>0301</b> | <b>0201</b> | <b>10</b>    | <b>0501</b> | III-III | 0        | 0.0        | 1         | 0.1        |            |
| LOW |             |             |              |             | tot     | <b>3</b> | <b>0.3</b> | <b>13</b> | <b>1.3</b> | <b>0.3</b> |
|     |             |             |              |             | X       |          |            |           |            |            |
| LOW | <b>1601</b> | <b>0502</b> | <b>0405</b>  | <b>0301</b> | I-I     | 1        | 0.1        | 4         | 0.4        |            |
| LOW | <b>1601</b> | <b>0502</b> | <b>0405</b>  | <b>0301</b> | I-III   | 1        | 0.1        | 5         | 0.5        |            |
| LOW | <b>1601</b> | <b>0502</b> | <b>0405</b>  | <b>0301</b> | III-III | 0        | 0.0        | 0         | 0.0        |            |
| LOW |             |             |              |             | tot     | <b>2</b> | <b>0.2</b> | <b>9</b>  | <b>0.9</b> | <b>0.2</b> |
|     |             |             |              |             | X       |          |            |           |            |            |
| LOW | <b>04</b>   | <b>0302</b> | <b>1401</b>  | <b>0503</b> | I-I     | 1        | 0.1        | 2         | 0.2        |            |
| LOW | <b>04</b>   | <b>0302</b> | <b>1401</b>  | <b>0503</b> | I-III   | 0        | 0.0        | 2         | 0.2        |            |
| LOW | <b>04</b>   | <b>0302</b> | <b>1401</b>  | <b>0503</b> | III-III | 0        | 0.0        | 1         | 0.1        |            |
| LOW |             |             |              |             | tot     | <b>1</b> | <b>0.1</b> | <b>5</b>  | <b>0.5</b> | <b>0.2</b> |
|     |             |             |              |             | X       |          |            |           |            |            |
| LOW | <b>0701</b> | <b>0201</b> | <b>0701</b>  | <b>0303</b> | I-I     | 0        | 0.0        | 1         | 0.1        |            |
| LOW | <b>0701</b> | <b>0201</b> | <b>0701</b>  | <b>0303</b> | I-III   | 0        | 0.0        | 1         | 0.1        |            |
| LOW | <b>0701</b> | <b>0201</b> | <b>0701</b>  | <b>0303</b> | III-III | 0        | 0.0        | 0         | 0.0        |            |
| LOW |             |             |              |             | tot     | <b>0</b> | <b>0.0</b> | <b>2</b>  | <b>0.2</b> | <b>0.2</b> |
|     |             |             |              |             | X       |          |            |           |            |            |
| LOW | <b>1601</b> | <b>0502</b> | <b>0301</b>  | <b>0301</b> | I-I     | 0        | 0.0        | 2         | 0.2        |            |
| LOW | <b>1601</b> | <b>0502</b> | <b>0301</b>  | <b>0301</b> | I-III   | 0        | 0.0        | 0         | 0.0        |            |
| LOW | <b>1601</b> | <b>0502</b> | <b>0301</b>  | <b>0301</b> | III-III | 0        | 0.0        | 0         | 0.0        |            |
| LOW |             |             |              |             | tot     | <b>0</b> | <b>0.0</b> | <b>2</b>  | <b>0.2</b> | <b>0.2</b> |
|     |             |             |              |             | X       |          |            |           |            |            |
| LOW | <b>0405</b> | <b>0201</b> | <b>11-12</b> | <b>0301</b> | I-I     | 0        | 0.0        | 1         | 0.1        |            |
| LOW | <b>0405</b> | <b>0201</b> | <b>11-12</b> | <b>0301</b> | I-III   | 0        | 0.0        | 1         | 0.1        |            |
| LOW | <b>0405</b> | <b>0201</b> | <b>11-12</b> | <b>0301</b> | III-III | 0        | 0.0        | 0         | 0.0        |            |
| LOW |             |             |              |             | tot     | <b>0</b> | <b>0.0</b> | <b>2</b>  | <b>0.2</b> | <b>0.2</b> |
|     |             |             |              |             | X       |          |            |           |            |            |
| LOW | <b>0405</b> | <b>0301</b> | <b>1501</b>  | <b>0502</b> | I-I     | 0        | 0.0        | 1         | 0.1        |            |
| LOW | <b>0405</b> | <b>0301</b> | <b>1501</b>  | <b>0502</b> | I-III   | 0        | 0.0        | 1         | 0.1        |            |
| LOW | <b>0405</b> | <b>0301</b> | <b>1501</b>  | <b>0502</b> | III-III | 0        | 0.0        | 0         | 0.0        |            |
| LOW |             |             |              |             | tot     | <b>0</b> | <b>0.0</b> | <b>2</b>  | <b>0.2</b> | <b>0.2</b> |
|     |             |             |              |             | X       |          |            |           |            |            |
| LOW | <b>0405</b> | <b>0301</b> | <b>1501</b>  | <b>0602</b> | I-I     | 0        | 0.0        | 1         | 0.1        |            |
| LOW | <b>0405</b> | <b>0301</b> | <b>1501</b>  | <b>0602</b> | I-III   | 0        | 0.0        | 1         | 0.1        |            |
| LOW | <b>0405</b> | <b>0301</b> | <b>1501</b>  | <b>0602</b> | III-III | 0        | 0.0        | 0         | 0.0        |            |
| LOW |             |             |              |             | tot     | <b>0</b> | <b>0.0</b> | <b>2</b>  | <b>0.2</b> | <b>0.2</b> |
|     |             |             |              |             | X       |          |            |           |            |            |
| LOW | <b>0403</b> | <b>0302</b> | <b>1501</b>  | <b>0602</b> | I-I     | 0        | 0.0        | 2         | 0.2        |            |
| LOW | <b>0403</b> | <b>0302</b> | <b>1501</b>  | <b>0602</b> | I-III   | 0        | 0.0        | 0         | 0.0        |            |

|     |              |             |              |             |         |          |     |          |     |     |
|-----|--------------|-------------|--------------|-------------|---------|----------|-----|----------|-----|-----|
| LOW | <b>0403</b>  | <b>0302</b> | <b>1501</b>  | <b>0602</b> | III-III | 0        | 0.0 | 0        | 0.0 |     |
| LOW |              |             |              |             | tot     | <b>0</b> | 0.0 | <b>2</b> | 0.2 | 0.2 |
|     |              |             |              |             | X       |          |     |          |     |     |
| LOW | <b>01</b>    | <b>0501</b> | <b>1502</b>  | <b>0601</b> | I-I     | 0        | 0.0 | 1        | 0.1 |     |
| LOW | <b>01</b>    | <b>0501</b> | <b>1502</b>  | <b>0601</b> | I-III   | 0        | 0.0 | 1        | 0.1 |     |
| LOW | <b>01</b>    | <b>0501</b> | <b>1502</b>  | <b>0601</b> | III-III | 0        | 0.0 | 0        | 0.0 |     |
| LOW |              |             |              |             | tot     | <b>0</b> | 0.0 | <b>2</b> | 0.2 | 0.2 |
|     |              |             |              |             | X       |          |     |          |     |     |
| LOW | <b>10</b>    | <b>0501</b> | <b>1401</b>  | <b>0503</b> | I-I     | 0        | 0.0 | 2        | 0.2 |     |
| LOW | <b>10</b>    | <b>0501</b> | <b>1401</b>  | <b>0503</b> | I-III   | 0        | 0.0 | 0        | 0.0 |     |
| LOW | <b>10</b>    | <b>0501</b> | <b>1401</b>  | <b>0503</b> | III-III | 0        | 0.0 | 0        | 0.0 |     |
| LOW |              |             |              |             | tot     | <b>0</b> | 0.0 | <b>2</b> | 0.2 | 0.2 |
|     |              |             |              |             | X       |          |     |          |     |     |
| LOW | <b>11-12</b> | <b>0301</b> | <b>11-12</b> | <b>0502</b> | I-I     | 0        | 0.0 | 2        | 0.2 |     |
| LOW | <b>11-12</b> | <b>0301</b> | <b>11-12</b> | <b>0502</b> | I-III   | 0        | 0.0 | 0        | 0.0 |     |
| LOW | <b>11-12</b> | <b>0301</b> | <b>11-12</b> | <b>0502</b> | III-III | 0        | 0.0 | 0        | 0.0 |     |
| LOW |              |             |              |             | tot     | <b>0</b> | 0.0 | <b>2</b> | 0.2 | 0.2 |
|     |              |             |              |             | X       |          |     |          |     |     |
| LOW | <b>11-12</b> | <b>0301</b> | <b>1501</b>  | <b>0602</b> | I-I     | 0        | 0.0 | 1        | 0.1 |     |
| LOW | <b>11-12</b> | <b>0301</b> | <b>1501</b>  | <b>0602</b> | I-III   | 0        | 0.0 | 1        | 0.1 |     |
| LOW | <b>11-12</b> | <b>0301</b> | <b>1501</b>  | <b>0602</b> | III-III | 0        | 0.0 | 0        | 0.0 |     |
| LOW |              |             |              |             | tot     | <b>0</b> | 0.0 | <b>2</b> | 0.2 | 0.2 |
|     |              |             |              |             | X       |          |     |          |     |     |
| LOW | <b>11-12</b> | <b>0301</b> | <b>1502</b>  | <b>0601</b> | I-I     | 0        | 0.0 | 1        | 0.1 |     |
| LOW | <b>11-12</b> | <b>0301</b> | <b>1502</b>  | <b>0601</b> | I-III   | 0        | 0.0 | 0        | 0.0 |     |
| LOW | <b>11-12</b> | <b>0301</b> | <b>1502</b>  | <b>0601</b> | III-III | 0        | 0.0 | 1        | 0.1 |     |
| LOW |              |             |              |             | tot     | <b>0</b> | 0.0 | <b>2</b> | 0.2 | 0.2 |
|     |              |             |              |             | X       |          |     |          |     |     |
| LOW | <b>0701</b>  | <b>0201</b> | <b>0403</b>  | <b>0304</b> | I-I     | 0        | 0.0 | 1        | 0.1 |     |
| LOW | <b>0701</b>  | <b>0201</b> | <b>0403</b>  | <b>0304</b> | I-III   | 0        | 0.0 | 0        | 0.0 |     |
| LOW | <b>0701</b>  | <b>0201</b> | <b>0403</b>  | <b>0304</b> | III-III | 0        | 0.0 | 1        | 0.1 |     |
| LOW |              |             |              |             | tot     | <b>0</b> | 0.0 | <b>2</b> | 0.2 | 0.2 |
|     |              |             |              |             | X       |          |     |          |     |     |
| LOW | <b>0701</b>  | <b>0201</b> | <b>1302</b>  | <b>0604</b> | I-I     | 0        | 0.0 | 2        | 0.2 |     |
| LOW | <b>0701</b>  | <b>0201</b> | <b>1302</b>  | <b>0604</b> | I-III   | 0        | 0.0 | 0        | 0.0 |     |
| LOW | <b>0701</b>  | <b>0201</b> | <b>1302</b>  | <b>0604</b> | III-III | 0        | 0.0 | 0        | 0.0 |     |
| LOW |              |             |              |             | tot     | <b>0</b> | 0.0 | <b>2</b> | 0.2 | 0.2 |
|     |              |             |              |             | X       |          |     |          |     |     |
| LOW | <b>0701</b>  | <b>0201</b> | <b>1501</b>  | <b>0602</b> | I-I     | 0        | 0.0 | 2        | 0.2 |     |
| LOW | <b>0701</b>  | <b>0201</b> | <b>1501</b>  | <b>0602</b> | I-III   | 0        | 0.0 | 0        | 0.0 |     |
| LOW | <b>0701</b>  | <b>0201</b> | <b>1501</b>  | <b>0602</b> | III-III | 0        | 0.0 | 0        | 0.0 |     |

|     |             |             |               |             |         |           |     |           |     |     |
|-----|-------------|-------------|---------------|-------------|---------|-----------|-----|-----------|-----|-----|
| LOW |             |             |               |             | tot     | <b>0</b>  | 0.0 | <b>2</b>  | 0.2 | 0.2 |
|     |             |             |               |             | X       |           |     |           |     |     |
| LOW | <b>0701</b> | <b>0303</b> | <b>11-12</b>  | <b>0301</b> | I-I     | 0         | 0.0 | 1         | 0.1 |     |
| LOW | <b>0701</b> | <b>0303</b> | <b>11-12</b>  | <b>0301</b> | I-III   | 0         | 0.0 | 1         | 0.1 |     |
| LOW | <b>0701</b> | <b>0303</b> | <b>11-12</b>  | <b>0301</b> | III-III | 0         | 0.0 | 0         | 0.0 |     |
| LOW |             |             |               |             | tot     | <b>0</b>  | 0.0 | <b>2</b>  | 0.2 | 0.2 |
|     |             |             |               |             | X       |           |     |           |     |     |
| LOW | <b>1301</b> | <b>0603</b> | <b>0701</b>   | <b>0201</b> | I-I     | 0         | 0.0 | 2         | 0.2 |     |
| LOW | <b>1301</b> | <b>0603</b> | <b>0701</b>   | <b>0201</b> | I-III   | 0         | 0.0 | 0         | 0.0 |     |
| LOW | <b>1301</b> | <b>0603</b> | <b>0701</b>   | <b>0201</b> | III-III | 0         | 0.0 | 0         | 0.0 |     |
| LOW |             |             |               |             | tot     | <b>0</b>  | 0.0 | <b>2</b>  | 0.2 | 0.2 |
|     |             |             |               |             | X       |           |     |           |     |     |
| LOW | <b>150</b>  | <b>060</b>  | <b>11-12</b>  | <b>0301</b> | I-I     | 0         | 0.0 | 1         | 0.1 |     |
| LOW | <b>150</b>  | <b>060</b>  | <b>11-12</b>  | <b>0301</b> | I-III   | 0         | 0.0 | 1         | 0.1 |     |
| LOW | <b>150</b>  | <b>060</b>  | <b>11-12</b>  | <b>0301</b> | III-III | 0         | 0.0 | 0         | 0.0 |     |
| LOW |             |             |               |             | tot     | <b>0</b>  | 0.0 | <b>2</b>  | 0.2 | 0.2 |
|     |             |             |               |             | X       |           |     |           |     |     |
| x   |             |             |               |             |         |           |     |           |     |     |
| LOW | <b>0301</b> | <b>0201</b> | <b>11-12</b>  | <b>0301</b> | I-I     | 13        | 1.4 | 47        | 4.6 |     |
| LOW | <b>0301</b> | <b>0201</b> | <b>11-12</b>  | <b>0301</b> | I-III   | 1         | 0.1 | 29        | 2.8 |     |
| LOW | <b>0301</b> | <b>0201</b> | <b>11-12</b>  | <b>0301</b> | III-III | 1         | 0.1 | 5         | 0.5 |     |
| LOW |             |             |               |             | tot     | <b>15</b> | 1.6 | <b>81</b> | 7.9 | 0.2 |
|     |             |             |               |             | X       |           |     |           |     |     |
| LOW | <b>04</b>   | <b>0302</b> | <b>0403</b>   | <b>0304</b> | I-I     | 0         | 0.0 | 1         | 0.1 |     |
| LOW | <b>04</b>   | <b>0302</b> | <b>0403</b>   | <b>0304</b> | I-III   | 0         | 0.0 | 2         | 0.2 |     |
| LOW | <b>04</b>   | <b>0302</b> | <b>0403</b>   | <b>0304</b> | III-III | 0         | 0.0 | 0         | 0.0 |     |
| LOW |             |             |               |             | tot     | <b>0</b>  | 0.0 | <b>3</b>  | 0.3 | 0.2 |
|     |             |             |               |             | X       |           |     |           |     |     |
| LOW | <b>04</b>   | <b>0302</b> | <b>1301</b>   | <b>0603</b> | I-I     | 0         | 0.0 | 3         | 0.3 |     |
| LOW | <b>04</b>   | <b>0302</b> | <b>1301</b>   | <b>0603</b> | I-III   | 0         | 0.0 | 0         | 0.0 |     |
| LOW | <b>04</b>   | <b>0302</b> | <b>1301</b>   | <b>0603</b> | III-III | 0         | 0.0 | 0         | 0.0 |     |
| LOW |             |             |               |             | tot     | <b>0</b>  | 0.0 | <b>3</b>  | 0.3 | 0.2 |
|     |             |             |               |             | X       |           |     |           |     |     |
| LOW | <b>0301</b> | <b>0201</b> | <b>0407</b>   | <b>0301</b> | I-I     | 0         | 0.0 | 3         | 0.3 |     |
| LOW | <b>0301</b> | <b>0201</b> | <b>0407</b>   | <b>0301</b> | I-III   | 0         | 0.0 | 0         | 0.0 |     |
| LOW | <b>0301</b> | <b>0201</b> | <b>0407</b>   | <b>0301</b> | III-III | 0         | 0.0 | 0         | 0.0 |     |
| LOW |             |             |               |             | tot     | <b>0</b>  | 0.0 | <b>3</b>  | 0.3 | 0.2 |
|     |             |             |               |             | X       |           |     |           |     |     |
| LOW | <b>0301</b> | <b>0201</b> | <b>1303-5</b> | <b>0301</b> | I-I     | 0         | 0.0 | 3         | 0.3 |     |
| LOW | <b>0301</b> | <b>0201</b> | <b>1303-5</b> | <b>0301</b> | I-III   | 0         | 0.0 | 0         | 0.0 |     |
| LOW | <b>0301</b> | <b>0201</b> | <b>1303-5</b> | <b>0301</b> | III-III | 0         | 0.0 | 0         | 0.0 |     |
| LOW |             |             |               |             | tot     | <b>0</b>  | 0.0 | <b>3</b>  | 0.3 | 0.2 |

|     |      |      |        |      |         |   |     |   |     |     |
|-----|------|------|--------|------|---------|---|-----|---|-----|-----|
|     |      |      |        |      | X       |   |     |   |     |     |
| LOW | 1601 | 0502 | 11-12  | 0502 | I-I     | 0 | 0.0 | 3 | 0.3 |     |
| LOW | 1601 | 0502 | 11-12  | 0502 | I-III   | 0 | 0.0 | 0 | 0.0 |     |
| LOW | 1601 | 0502 | 11-12  | 0502 | III-III | 0 | 0.0 | 0 | 0.0 |     |
| LOW |      |      |        |      | tot     | 0 | 0.0 | 3 | 0.3 | 0.2 |
|     |      |      |        |      | X       |   |     |   |     |     |
| LOW | 1601 | 0502 | 0701   | 0303 | I-I     | 0 | 0.0 | 2 | 0.2 |     |
| LOW | 1601 | 0502 | 0701   | 0303 | I-III   | 0 | 0.0 | 1 | 0.1 |     |
| LOW | 1601 | 0502 | 0701   | 0303 | III-III | 0 | 0.0 | 0 | 0.0 |     |
| LOW |      |      |        |      | tot     | 0 | 0.0 | 3 | 0.3 | 0.2 |
|     |      |      |        |      | X       |   |     |   |     |     |
| LOW | 1601 | 0502 | 1302   | 0604 | I-I     | 0 | 0.0 | 3 | 0.3 |     |
| LOW | 1601 | 0502 | 1302   | 0604 | I-III   | 0 | 0.0 | 0 | 0.0 |     |
| LOW | 1601 | 0502 | 1302   | 0604 | III-III | 0 | 0.0 | 0 | 0.0 |     |
| LOW |      |      |        |      | tot     | 0 | 0.0 | 3 | 0.3 | 0.2 |
|     |      |      |        |      | X       |   |     |   |     |     |
| LOW | 1601 | 0502 | 1303-5 | 0301 | I-I     | 0 | 0.0 | 2 | 0.2 |     |
| LOW | 1601 | 0502 | 1303-5 | 0301 | I-III   | 0 | 0.0 | 1 | 0.1 |     |
| LOW | 1601 | 0502 | 1303-5 | 0301 | III-III | 0 | 0.0 | 0 | 0.0 |     |
| LOW |      |      |        |      | tot     | 0 | 0.0 | 3 | 0.3 | 0.2 |
|     |      |      |        |      | X       |   |     |   |     |     |
| LOW | 0405 | 0301 | 1401   | 0503 | I-I     | 0 | 0.0 | 3 | 0.3 |     |
| LOW | 0405 | 0301 | 1401   | 0503 | I-III   | 0 | 0.0 | 0 | 0.0 |     |
| LOW | 0405 | 0301 | 1401   | 0503 | III-III | 0 | 0.0 | 0 | 0.0 |     |
| LOW |      |      |        |      | tot     | 0 | 0.0 | 3 | 0.3 | 0.2 |
|     |      |      |        |      | X       |   |     |   |     |     |
| LOW | 0403 | 0304 | 11-12  | 0301 | I-I     | 0 | 0.0 | 2 | 0.2 |     |
| LOW | 0403 | 0304 | 11-12  | 0301 | I-III   | 0 | 0.0 | 1 | 0.1 |     |
| LOW | 0403 | 0304 | 11-12  | 0301 | III-III | 0 | 0.0 | 0 | 0.0 |     |
| LOW |      |      |        |      | tot     | 0 | 0.0 | 3 | 0.3 | 0.2 |
|     |      |      |        |      | X       |   |     |   |     |     |
| LOW | 0403 | 0304 | 1401   | 0503 | I-I     | 0 | 0.0 | 3 | 0.3 |     |
| LOW | 0403 | 0304 | 1401   | 0503 | I-III   | 0 | 0.0 | 0 | 0.0 |     |
| LOW | 0403 | 0304 | 1401   | 0503 | III-III | 0 | 0.0 | 0 | 0.0 |     |
| LOW |      |      |        |      | tot     | 0 | 0.0 | 3 | 0.3 | 0.2 |
|     |      |      |        |      | X       |   |     |   |     |     |
| LOW | 0403 | 0305 | 11-12  | 0301 | I-I     | 0 | 0.0 | 3 | 0.3 |     |
| LOW | 0403 | 0305 | 11-12  | 0301 | I-III   | 0 | 0.0 | 0 | 0.0 |     |
| LOW | 0403 | 0305 | 11-12  | 0301 | III-III | 0 | 0.0 | 0 | 0.0 |     |
| LOW |      |      |        |      | tot     | 0 | 0.0 | 3 | 0.3 | 0.2 |
|     |      |      |        |      | X       |   |     |   |     |     |

|     |              |             |             |             |         |          |     |           |     |     |
|-----|--------------|-------------|-------------|-------------|---------|----------|-----|-----------|-----|-----|
| LOW | <b>01</b>    | <b>0501</b> | <b>1301</b> | <b>0603</b> | I-I     | 0        | 0.0 | 3         | 0.3 |     |
| LOW | <b>01</b>    | <b>0501</b> | <b>1301</b> | <b>0603</b> | I-III   | 0        | 0.0 | 0         | 0.0 |     |
| LOW | <b>01</b>    | <b>0501</b> | <b>1301</b> | <b>0603</b> | III-III | 0        | 0.0 | 0         | 0.0 |     |
| LOW |              |             |             |             | tot     | <b>0</b> | 0.0 | <b>3</b>  | 0.3 | 0.2 |
|     |              |             |             |             | X       |          |     |           |     |     |
| LOW | <b>0701</b>  | <b>0201</b> | <b>10</b>   | <b>0501</b> | I-I     | 0        | 0.0 | 3         | 0.3 |     |
| LOW | <b>0701</b>  | <b>0201</b> | <b>10</b>   | <b>0501</b> | I-III   | 0        | 0.0 | 0         | 0.0 |     |
| LOW | <b>0701</b>  | <b>0201</b> | <b>10</b>   | <b>0501</b> | III-III | 0        | 0.0 | 0         | 0.0 |     |
| LOW |              |             |             |             | tot     | <b>0</b> | 0.0 | <b>3</b>  | 0.3 | 0.2 |
|     |              |             |             |             | X       |          |     |           |     |     |
| LOW | <b>1401</b>  | <b>0503</b> | <b>1502</b> | <b>0601</b> | I-I     | 0        | 0.0 | 2         | 0.2 |     |
| LOW | <b>1401</b>  | <b>0503</b> | <b>1502</b> | <b>0601</b> | I-III   | 0        | 0.0 | 1         | 0.1 |     |
| LOW | <b>1401</b>  | <b>0503</b> | <b>1502</b> | <b>0601</b> | III-III | 0        | 0.0 | 0         | 0.0 |     |
| LOW |              |             |             |             | tot     | <b>0</b> | 0.0 | <b>3</b>  | 0.3 | 0.2 |
|     |              |             |             |             | X       |          |     |           |     |     |
| LOW | <b>1601</b>  | <b>0502</b> | <b>1601</b> | <b>0502</b> | I-I     | 6        | 0.6 | 36        | 3.5 |     |
| LOW | <b>1601</b>  | <b>0502</b> | <b>1601</b> | <b>0502</b> | I-III   | 2        | 0.2 | 20        | 2.0 |     |
| LOW | <b>1601</b>  | <b>0502</b> | <b>1601</b> | <b>0502</b> | III-III | 0        | 0.0 | 3         | 0.3 |     |
| LOW |              |             |             |             | tot     | <b>8</b> | 0.8 | <b>59</b> | 5.8 | 0.1 |
|     |              |             |             |             | X       |          |     |           |     |     |
| LOW | <b>0301</b>  | <b>0201</b> | <b>1401</b> | <b>0503</b> | I-I     | 1        | 0.1 | 6         | 0.6 |     |
| LOW | <b>0301</b>  | <b>0201</b> | <b>1401</b> | <b>0503</b> | I-III   | 0        | 0.0 | 1         | 0.1 |     |
| LOW | <b>0301</b>  | <b>0201</b> | <b>1401</b> | <b>0503</b> | III-III | 0        | 0.0 | 1         | 0.1 |     |
| LOW |              |             |             |             | tot     | <b>1</b> | 0.1 | <b>8</b>  | 0.8 | 0.1 |
|     |              |             |             |             | X       |          |     |           |     |     |
| LOW | <b>1601</b>  | <b>0502</b> | <b>1501</b> | <b>0602</b> | I-I     | 0        | 0.0 | 4         | 0.4 |     |
| LOW | <b>1601</b>  | <b>0502</b> | <b>1501</b> | <b>0602</b> | I-III   | 0        | 0.0 | 0         | 0.0 |     |
| LOW | <b>1601</b>  | <b>0502</b> | <b>1501</b> | <b>0602</b> | III-III | 0        | 0.0 | 0         | 0.0 |     |
| LOW |              |             |             |             | tot     | <b>0</b> | 0.0 | <b>4</b>  | 0.4 | 0.1 |
|     |              |             |             |             | X       |          |     |           |     |     |
| LOW | <b>0403</b>  | <b>0302</b> | <b>01</b>   | <b>0501</b> | I-I     | 0        | 0.0 | 4         | 0.4 |     |
| LOW | <b>0403</b>  | <b>0302</b> | <b>01</b>   | <b>0501</b> | I-III   | 0        | 0.0 | 0         | 0.0 |     |
| LOW | <b>0403</b>  | <b>0302</b> | <b>01</b>   | <b>0501</b> | III-III | 0        | 0.0 | 0         | 0.0 |     |
| LOW |              |             |             |             | tot     | <b>0</b> | 0.0 | <b>4</b>  | 0.4 | 0.1 |
|     |              |             |             |             | X       |          |     |           |     |     |
| LOW | <b>01</b>    | <b>0501</b> | <b>0701</b> | <b>0201</b> | I-I     | 0        | 0.0 | 2         | 0.2 |     |
| LOW | <b>01</b>    | <b>0501</b> | <b>0701</b> | <b>0201</b> | I-III   | 0        | 0.0 | 2         | 0.2 |     |
| LOW | <b>01</b>    | <b>0501</b> | <b>0701</b> | <b>0201</b> | III-III | 0        | 0.0 | 0         | 0.0 |     |
| LOW |              |             |             |             | tot     | <b>0</b> | 0.0 | <b>4</b>  | 0.4 | 0.1 |
|     |              |             |             |             | X       |          |     |           |     |     |
| LOW | <b>11-12</b> | <b>0301</b> | <b>1301</b> | <b>0603</b> | I-I     | 0        | 0.0 | 3         | 0.3 |     |

|     |              |             |              |             |         |          |     |           |     |     |
|-----|--------------|-------------|--------------|-------------|---------|----------|-----|-----------|-----|-----|
| LOW | <b>11-12</b> | <b>0301</b> | <b>1301</b>  | <b>0603</b> | I-III   | 0        | 0.0 | 1         | 0.1 |     |
| LOW | <b>11-12</b> | <b>0301</b> | <b>1301</b>  | <b>0603</b> | III-III | 0        | 0.0 | 0         | 0.0 |     |
| LOW |              |             |              |             | tot     | <b>0</b> | 0.0 | <b>4</b>  | 0.4 | 0.1 |
|     |              |             |              |             | X       |          |     |           |     |     |
| LOW | <b>1601</b>  | <b>0502</b> | <b>0701</b>  | <b>0201</b> | I-I     | 2        | 0.2 | 13        | 1.3 |     |
| LOW | <b>1601</b>  | <b>0502</b> | <b>0701</b>  | <b>0201</b> | I-III   | 0        | 0.0 | 7         | 0.7 |     |
| LOW | <b>1601</b>  | <b>0502</b> | <b>0701</b>  | <b>0201</b> | III-III | 0        | 0.0 | 0         | 0.0 |     |
| LOW |              |             |              |             | tot     | <b>2</b> | 0.2 | <b>20</b> | 2.0 | 0.1 |
|     |              |             |              |             | X       |          |     |           |     |     |
| LOW | <b>0301</b>  | <b>0201</b> | <b>0701</b>  | <b>0303</b> | I-I     | 0        | 0.0 | 4         | 0.4 |     |
| LOW | <b>0301</b>  | <b>0201</b> | <b>0701</b>  | <b>0303</b> | I-III   | 0        | 0.0 | 1         | 0.1 |     |
| LOW | <b>0301</b>  | <b>0201</b> | <b>0701</b>  | <b>0303</b> | III-III | 0        | 0.0 | 0         | 0.0 |     |
| LOW |              |             |              |             | tot     | <b>0</b> | 0.0 | <b>5</b>  | 0.5 | 0.1 |
|     |              |             |              |             | X       |          |     |           |     |     |
| LOW | <b>0301</b>  | <b>0201</b> | <b>1301</b>  | <b>0603</b> | I-I     | 0        | 0.0 | 0         | 0.0 |     |
| LOW | <b>0301</b>  | <b>0201</b> | <b>1301</b>  | <b>0603</b> | I-III   | 0        | 0.0 | 3         | 0.3 |     |
| LOW | <b>0301</b>  | <b>0201</b> | <b>1301</b>  | <b>0603</b> | III-III | 0        | 0.0 | 2         | 0.2 |     |
| LOW |              |             |              |             | tot     | <b>0</b> | 0.0 | <b>5</b>  | 0.5 | 0.1 |
|     |              |             |              |             | X       |          |     |           |     |     |
| LOW | <b>1601</b>  | <b>0502</b> | <b>0403</b>  | <b>0302</b> | I-I     | 0        | 0.0 | 2         | 0.2 |     |
| LOW | <b>1601</b>  | <b>0502</b> | <b>0403</b>  | <b>0302</b> | I-III   | 0        | 0.0 | 3         | 0.3 |     |
| LOW | <b>1601</b>  | <b>0502</b> | <b>0403</b>  | <b>0302</b> | III-III | 0        | 0.0 | 0         | 0.0 |     |
| LOW |              |             |              |             | tot     | <b>0</b> | 0.0 | <b>5</b>  | 0.5 | 0.1 |
|     |              |             |              |             | X       |          |     |           |     |     |
| LOW | <b>0405</b>  | <b>0301</b> | <b>01</b>    | <b>0501</b> | I-I     | 0        | 0.0 | 4         | 0.4 |     |
| LOW | <b>0405</b>  | <b>0301</b> | <b>01</b>    | <b>0501</b> | I-III   | 0        | 0.0 | 0         | 0.0 |     |
| LOW | <b>0405</b>  | <b>0301</b> | <b>01</b>    | <b>0501</b> | III-III | 0        | 0.0 | 1         | 0.1 |     |
| LOW |              |             |              |             | tot     | <b>0</b> | 0.0 | <b>5</b>  | 0.5 | 0.1 |
|     |              |             |              |             | X       |          |     |           |     |     |
| LOW | <b>0403</b>  | <b>0302</b> | <b>11-12</b> | <b>0301</b> | I-I     | 0        | 0.0 | 1         | 0.1 |     |
| LOW | <b>0403</b>  | <b>0302</b> | <b>11-12</b> | <b>0301</b> | I-III   | 0        | 0.0 | 3         | 0.3 |     |
| LOW | <b>0403</b>  | <b>0302</b> | <b>11-12</b> | <b>0301</b> | III-III | 0        | 0.0 | 1         | 0.1 |     |
| LOW |              |             |              |             | tot     | <b>0</b> | 0.0 | <b>5</b>  | 0.5 | 0.1 |
|     |              |             |              |             | X       |          |     |           |     |     |
| LOW | <b>0403</b>  | <b>0304</b> | <b>01</b>    | <b>0501</b> | I-I     | 0        | 0.0 | 2         | 0.2 |     |
| LOW | <b>0403</b>  | <b>0304</b> | <b>01</b>    | <b>0501</b> | I-III   | 0        | 0.0 | 3         | 0.3 |     |
| LOW | <b>0403</b>  | <b>0304</b> | <b>01</b>    | <b>0501</b> | III-III | 0        | 0.0 | 0         | 0.0 |     |
| LOW |              |             |              |             | tot     | <b>0</b> | 0.0 | <b>5</b>  | 0.5 | 0.1 |
|     |              |             |              |             | X       |          |     |           |     |     |
| LOW | <b>01</b>    | <b>0501</b> | <b>10</b>    | <b>0501</b> | I-I     | 0        | 0.0 | 3         | 0.3 |     |
| LOW | <b>01</b>    | <b>0501</b> | <b>10</b>    | <b>0501</b> | I-III   | 0        | 0.0 | 2         | 0.2 |     |

|     |              |             |              |             |         |          |     |           |     |     |
|-----|--------------|-------------|--------------|-------------|---------|----------|-----|-----------|-----|-----|
| LOW | <b>01</b>    | <b>0501</b> | <b>10</b>    | <b>0501</b> | III-III | 0        | 0.0 | 0         | 0.0 |     |
| LOW |              |             |              |             | tot     | <b>0</b> | 0.0 | <b>5</b>  | 0.5 | 0.1 |
|     |              |             |              |             | X       |          |     |           |     |     |
| LOW | <b>01</b>    | <b>0501</b> | <b>01</b>    | <b>0501</b> | I-I     | 1        | 0.1 | 5         | 0.5 |     |
| LOW | <b>01</b>    | <b>0501</b> | <b>01</b>    | <b>0501</b> | I-III   | 0        | 0.0 | 7         | 0.7 |     |
| LOW | <b>01</b>    | <b>0501</b> | <b>01</b>    | <b>0501</b> | III-III | 0        | 0.0 | 0         | 0.0 |     |
| LOW |              |             |              |             | tot     | <b>1</b> | 0.1 | <b>12</b> | 1.2 | 0.1 |
|     |              |             |              |             | X       |          |     |           |     |     |
| LOW | <b>01</b>    | <b>0501</b> | <b>11-12</b> | <b>0301</b> | I-I     | 2        | 0.2 | 18        | 1.8 |     |
| LOW | <b>01</b>    | <b>0501</b> | <b>11-12</b> | <b>0301</b> | I-III   | 0        | 0.0 | 7         | 0.7 |     |
| LOW | <b>01</b>    | <b>0501</b> | <b>11-12</b> | <b>0301</b> | III-III | 0        | 0.0 | 2         | 0.2 |     |
| LOW |              |             |              |             | tot     | <b>2</b> | 0.2 | <b>27</b> | 2.6 | 0.1 |
|     |              |             |              |             | X       |          |     |           |     |     |
| LOW | <b>01</b>    | <b>0501</b> | <b>1401</b>  | <b>0503</b> | I-I     | 0        | 0.0 | 4         | 0.4 |     |
| LOW | <b>01</b>    | <b>0501</b> | <b>1401</b>  | <b>0503</b> | I-III   | 0        | 0.0 | 2         | 0.2 |     |
| LOW | <b>01</b>    | <b>0501</b> | <b>1401</b>  | <b>0503</b> | III-III | 0        | 0.0 | 0         | 0.0 |     |
| LOW |              |             |              |             | tot     | <b>0</b> | 0.0 | <b>6</b>  | 0.6 | 0.1 |
|     |              |             |              |             | X       |          |     |           |     |     |
| LOW | <b>10</b>    | <b>0501</b> | <b>11-12</b> | <b>0301</b> | I-I     | 0        | 0.0 | 6         | 0.6 |     |
| LOW | <b>10</b>    | <b>0501</b> | <b>11-12</b> | <b>0301</b> | I-III   | 0        | 0.0 | 0         | 0.0 |     |
| LOW | <b>10</b>    | <b>0501</b> | <b>11-12</b> | <b>0301</b> | III-III | 0        | 0.0 | 0         | 0.0 |     |
| LOW |              |             |              |             | tot     | <b>0</b> | 0.0 | <b>6</b>  | 0.6 | 0.1 |
|     |              |             |              |             | X       |          |     |           |     |     |
| LOW | <b>11-12</b> | <b>0301</b> | <b>1302</b>  | <b>0604</b> | I-I     | 0        | 0.0 | 4         | 0.4 |     |
| LOW | <b>11-12</b> | <b>0301</b> | <b>1302</b>  | <b>0604</b> | I-III   | 0        | 0.0 | 2         | 0.2 |     |
| LOW | <b>11-12</b> | <b>0301</b> | <b>1302</b>  | <b>0604</b> | III-III | 0        | 0.0 | 0         | 0.0 |     |
| LOW |              |             |              |             | tot     | <b>0</b> | 0.0 | <b>6</b>  | 0.6 | 0.1 |
|     |              |             |              |             | X       |          |     |           |     |     |
| LOW | <b>11-12</b> | <b>0301</b> | <b>1401</b>  | <b>0503</b> | I-I     | 0        | 0.0 | 4         | 0.4 |     |
| LOW | <b>11-12</b> | <b>0301</b> | <b>1401</b>  | <b>0503</b> | I-III   | 0        | 0.0 | 2         | 0.2 |     |
| LOW | <b>11-12</b> | <b>0301</b> | <b>1401</b>  | <b>0503</b> | III-III | 0        | 0.0 | 0         | 0.0 |     |
| LOW |              |             |              |             | tot     | <b>0</b> | 0.0 | <b>6</b>  | 0.6 | 0.1 |
|     |              |             |              |             | X       |          |     |           |     |     |
| LOW | <b>0405</b>  | <b>0301</b> | <b>11-12</b> | <b>0301</b> | I-I     | 0        | 0.0 | 5         | 0.5 |     |
| LOW | <b>0405</b>  | <b>0301</b> | <b>11-12</b> | <b>0301</b> | I-III   | 0        | 0.0 | 2         | 0.2 |     |
| LOW | <b>0405</b>  | <b>0301</b> | <b>11-12</b> | <b>0301</b> | III-III | 0        | 0.0 | 0         | 0.0 |     |
| LOW |              |             |              |             | tot     | <b>0</b> | 0.0 | <b>7</b>  | 0.7 | 0.1 |
|     |              |             |              |             | X       |          |     |           |     |     |
| LOW | <b>1601</b>  | <b>0502</b> | <b>0403</b>  | <b>0304</b> | I-I     | 0        | 0.0 | 6         | 0.6 |     |
| LOW | <b>1601</b>  | <b>0502</b> | <b>0403</b>  | <b>0304</b> | I-III   | 0        | 0.0 | 1         | 0.1 |     |
| LOW | <b>1601</b>  | <b>0502</b> | <b>0403</b>  | <b>0304</b> | III-III | 0        | 0.0 | 1         | 0.1 |     |

|     |       |      |       |      |         |     |     |      |     |     |
|-----|-------|------|-------|------|---------|-----|-----|------|-----|-----|
| LOW |       |      |       |      | tot     | 0   | 0.0 | 8    | 0.8 | 0.1 |
|     |       |      |       |      | X       |     |     |      |     |     |
| LOW | 1601  | 0502 | 10    | 0501 | I-I     | 0   | 0.0 | 5    | 0.5 |     |
| LOW | 1601  | 0502 | 10    | 0501 | I-III   | 0   | 0.0 | 4    | 0.4 |     |
| LOW | 1601  | 0502 | 10    | 0501 | III-III | 0   | 0.0 | 0    | 0.0 |     |
| LOW |       |      |       |      | tot     | 0   | 0.0 | 9    | 0.9 | 0.1 |
|     |       |      |       |      | X       |     |     |      |     |     |
| LOW | 1601  | 0502 | 1301  | 0603 | I-I     | 0   | 0.0 | 5    | 0.5 |     |
| LOW | 1601  | 0502 | 1301  | 0603 | I-III   | 0   | 0.0 | 3    | 0.3 |     |
| LOW | 1601  | 0502 | 1301  | 0603 | III-III | 0   | 0.0 | 0    | 0.0 |     |
| LOW |       |      |       |      | tot     | 0   | 0.0 | 8    | 0.8 | 0.1 |
|     |       |      |       |      | X       |     |     |      |     |     |
| LOW | 1601  | 0502 | 1502  | 0601 | I-I     | 0   | 0.0 | 8    | 0.8 |     |
| LOW | 1601  | 0502 | 1502  | 0601 | I-III   | 0   | 0.0 | 1    | 0.1 |     |
| LOW | 1601  | 0502 | 1502  | 0601 | III-III | 0   | 0.0 | 1    | 0.1 |     |
| LOW |       |      |       |      | tot     | 0   | 0.0 | 10   | 1.0 | 0.1 |
|     |       |      |       |      | X       |     |     |      |     |     |
| LOW | 1601  | 0502 | 1401  | 0503 | I-I     | 0   | 0.0 | 8    | 0.8 |     |
| LOW | 1601  | 0502 | 1401  | 0503 | I-III   | 0   | 0.0 | 3    | 0.3 |     |
| LOW | 1601  | 0502 | 1401  | 0503 | III-III | 0   | 0.0 | 0    | 0.0 |     |
| LOW |       |      |       |      | tot     | 0   | 0.0 | 11   | 1.1 | 0.0 |
|     |       |      |       |      | X       |     |     |      |     |     |
| LOW | 11-12 | 0301 | 0701  | 0201 | I-I     | 0   | 0.0 | 12   | 1.2 |     |
| LOW | 11-12 | 0301 | 0701  | 0201 | I-III   | 0   | 0.0 | 4    | 0.4 |     |
| LOW | 11-12 | 0301 | 0701  | 0201 | III-III | 0   | 0.0 | 0    | 0.0 |     |
| LOW |       |      |       |      | tot     | 0   | 0.0 | 16   | 1.6 | 0.0 |
|     |       |      |       |      | X       |     |     |      |     |     |
| LOW | 1601  | 0502 | 11-12 | 0301 | I-I     | 1   | 0.1 | 38   | 3.7 |     |
| LOW | 1601  | 0502 | 11-12 | 0301 | I-III   | 0   | 0.0 | 19   | 1.9 |     |
| LOW | 1601  | 0502 | 11-12 | 0301 | III-III | 0   | 0.0 | 0    | 0.0 |     |
| LOW |       |      |       |      | tot     | 1   | 0.1 | 57   | 5.6 | 0.0 |
|     |       |      |       |      | X       |     |     |      |     |     |
| LOW | 11-12 | 0301 | 11-12 | 0301 | I-I     | 0   | 0.0 | 24   | 2.3 |     |
| LOW | 11-12 | 0301 | 11-12 | 0301 | I-III   | 0   | 0.0 | 10   | 1.0 |     |
| LOW | 11-12 | 0301 | 11-12 | 0301 | III-III | 0   | 0.0 | 2    | 0.2 |     |
| LOW |       |      |       |      | tot     | 0   | 0.0 | 36   | 3.5 | 0.0 |
|     |       |      |       |      | Tot     | 944 |     | 1023 |     |     |

\*DRB1\*04-DQB1\*0302 refers to any DRB1\*04 subtype different from DRB1\*0403

\*\*When the counts in the patient or control group were equal to 0, the P/C ratio was computed by adding 0.5 counts in each category

**Relative distribution of *INS* and *HLA-DRB1-DQB1* genotypes in 944 Type 1 diabetes patients stratified according to their age of disease onset.**

| Age of onset<br>GENOTYPES | PATIENTS 0-14 yrs |     |      | Patients 15-40 yrs |      |
|---------------------------|-------------------|-----|------|--------------------|------|
|                           | INS               | N   | %    | N                  | %    |
| DRB1-DQB1                 |                   |     |      |                    |      |
| HIGH RISK                 | I-I               | 346 | 75.7 | 86                 | 73.5 |
| HIGH RISK                 | III+              | 111 | 24.3 | 31                 | 26.5 |
| INTERMEDIATE RISK         | I-I               | 218 | 86.2 | 61                 | 85.9 |
| INTERMEDIATE RISK         | III+              | 35  | 13.8 | 10                 | 14.1 |
| LOW RISK                  | I-I               | 26  | 81.3 | 13                 | 92.9 |
| LOW RISK                  | III+              | 6   | 18.8 | 1                  | 7.1  |
| TOT                       |                   | 742 |      | 202                |      |
